# Supplementary material for: LIN9, a Subunit of the DREAM Complex, Regulates Mitotic Gene Expression and Proliferation of Embryonic Stem Cells
Source: PubMed Central journal article supplement (PMC3647048; doi:10.1371/journal.pone.0062882), 2013-05-07

Supplementary Figure S1

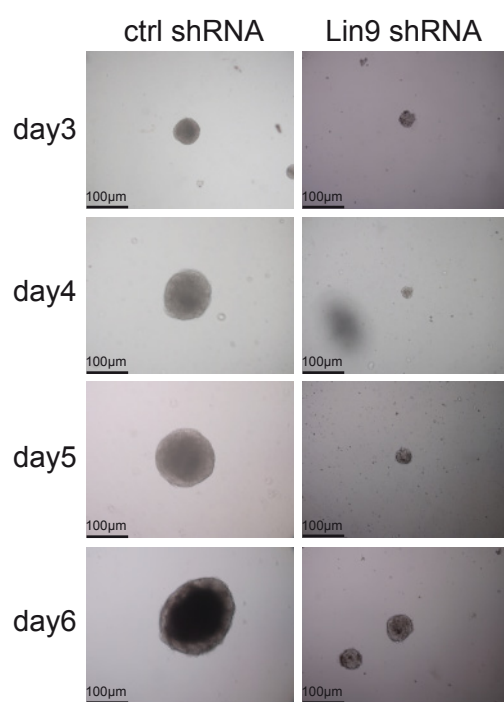

Supplement: pone.0062882.s001.pdf [file pone.0062882.s001.pdf]
