# Supplementary material for: LIN9, a Subunit of the DREAM Complex, Regulates Mitotic Gene Expression and Proliferation of Embryonic Stem Cells
Source: PLoS One. 2013 May 7;8(5):e62882. doi: 10.1371/journal.pone.0062882 (PMC3647048; doi:10.1371/journal.pone.0062882)
Supplement: Table S1 — LIN9 regulated genes in ESCs as determined by microarray analysis. (XLS) [file pone.0062882.s002.xls]

## Sheet: DataFrame
Supplementary Table 1. LIN9 regulated genes in ES cells
Genes regulated > 1.5 fold after depletion of LIN9
GeneNames	GeneDescriptions	Genes	Fold change
Gm11487	predicted gene 11487 [Source:MGI Symbol;Acc:MGI:3650704]	ENSMUSG00000066137	3.94954
Gm11236, Gm11238, Gm11239, Gm428	predicted gene 11236 [Source:MGI Symbol;Acc:MGI:3702277] /// predicted gene 11238 [Source:MGI Symbol;Acc:MGI:3702316] /// predicted gene 11239 [Source:MGI Symbol;Acc:MGI:3702319] /// predicted gene 428 [Source:MGI Symbol;Acc:MGI:2685274]	ENSMUSG00000096700, ENSMUSG00000094116, ENSMUSG00000095048, ENSMUSG00000095341	3.74452
Tcstv3	2-cell-stage, variable group, member 3 [Source:MGI Symbol;Acc:MGI:2675349]	ENSMUSG00000095821	3.36032
Afp	alpha fetoprotein [Source:MGI Symbol;Acc:MGI:87951]	ENSMUSG00000054932	3.16857
Dnahc8	dynein, axonemal, heavy chain 8 [Source:MGI Symbol;Acc:MGI:107714]	ENSMUSG00000033826	3.11924
Afp	alpha fetoprotein [Source:MGI Symbol;Acc:MGI:87951]	ENSMUSG00000054932	3.10759
Tmem106a	transmembrane protein 106A [Source:MGI Symbol;Acc:MGI:1922056]	ENSMUSG00000034947	3.04462
Gad1	glutamate decarboxylase 1 [Source:MGI Symbol;Acc:MGI:95632]	ENSMUSG00000070880	2.98981
Ccdc141	coiled-coil domain containing 141 [Source:MGI Symbol;Acc:MGI:1919735]	ENSMUSG00000044033	2.71147
S100g	S100 calcium binding protein G [Source:MGI Symbol;Acc:MGI:104528]	ENSMUSG00000040808	2.65743
Arhgap26	Rho GTPase activating protein 26 [Source:MGI Symbol;Acc:MGI:1918552]	ENSMUSG00000036452	2.65486
Afp	alpha fetoprotein [Source:MGI Symbol;Acc:MGI:87951]	ENSMUSG00000054932	2.63703
Ppp4r1	protein phosphatase 4, regulatory subunit 1 [Source:MGI Symbol;Acc:MGI:1917601]	ENSMUSG00000061950	2.61989
1600029D21Rik	RIKEN cDNA 1600029D21 gene [Source:MGI Symbol;Acc:MGI:1923759]	ENSMUSG00000032068	2.59028
Pcdh8	protocadherin 8 [Source:MGI Symbol;Acc:MGI:1306800]	ENSMUSG00000036422	2.5667
Afp	alpha fetoprotein [Source:MGI Symbol;Acc:MGI:87951]	ENSMUSG00000054932	2.51151
Gm15299, Defa3, Defa24, Defa-rs7, Defa-ps1 (pseudogene), Gm15284, Defa23, Defa17, Defa-ps6 (pseudogene)	predicted pseudogene 15299 [Source:MGI Symbol;Acc:MGI:3642780] /// defensin, alpha, 3 [Source:MGI Symbol;Acc:MGI:94883] /// defensin, alpha, 24 [Source:MGI Symbol;Acc:MGI:3630383] /// defensin, alpha, related sequence 7 [Source:MGI Symbol;Acc:MGI:102509] /// defensin, alpha, pseudogene 1 [Source:MGI Symbol;Acc:MGI:3630392] /// predicted gene 15284 [Source:MGI Symbol;Acc:MGI:3808881] /// defensin,…	ENSMUSG00000082211, ENSMUSG00000074440, ENSMUSG00000064213, ENSMUSG00000074442, ENSMUSG00000095813, ENSMUSG00000074444, ENSMUSG00000074446, ENSMUSG00000060208, ENSMUSG00000095328	2.48802
Gm15299	predicted pseudogene 15299 [Source:MGI Symbol;Acc:MGI:3642780]	ENSMUSG00000082211	2.48554
Vax2	ventral anterior homeobox containing gene 2 [Source:MGI Symbol;Acc:MGI:1346018]	ENSMUSG00000034777	2.4799
D630013G24Rik	RIKEN cDNA D630013G24 gene [Source:MGI Symbol;Acc:MGI:2442801]	ENSMUSG00000040969	2.45395
Gm4003 (pseudogene), Gm10679 (pseudogene), Gm3980 (pseudogene), Gm3987 (pseudogene), Gm3984 (pseudogene), Gm4023 (pseudogene), Gm4897 (pseudogene), Gm10678 (pseudogene), Gm3981 (pseudogene), Gm3994 (pseudogene), Gm3989 (pseudogene), Gm3998 (pseudogene), Gm4001 (pseudogene), Gm4014 (pseudogene), Gm3977 (pseudogene), Gm3996 (pseudogene)	predicted gene 4003 [Source:MGI Symbol;Acc:MGI:3782177] /// predicted gene 10679 [Source:MGI Symbol;Acc:MGI:3641735] /// predicted gene 3980 [Source:MGI Symbol;Acc:MGI:3782153] /// predicted gene 3987 [Source:MGI Symbol;Acc:MGI:3782160] /// predicted gene 3984 [Source:MGI Symbol;Acc:MGI:3782157] /// predicted gene 4023 [Source:MGI Symbol;Acc:MGI:3782197] /// predicted gene 4897 [Source:MGI Symbol…	ENSMUSG00000094243, ENSMUSG00000095274, ENSMUSG00000095974, ENSMUSG00000094412, ENSMUSG00000096414, ENSMUSG00000093420, ENSMUSG00000096439, ENSMUSG00000093913, ENSMUSG00000093623, ENSMUSG00000094967, ENSMUSG00000093961, ENSMUSG00000096797, ENSMUSG00000095922, ENSMUSG00000093397, ENSMUSG00000095952, ENSMUSG00000093940	2.44145
AF067063	cDNA sequence AF067063 [Source:MGI Symbol;Acc:MGI:2687009]	ENSMUSG00000063846	2.40352
Pdgfra	platelet derived growth factor receptor, alpha polypeptide [Source:MGI Symbol;Acc:MGI:97530]	ENSMUSG00000029231	2.35154
Pdgfra	platelet derived growth factor receptor, alpha polypeptide [Source:MGI Symbol;Acc:MGI:97530]	ENSMUSG00000029231	2.35012
Pdgfra	platelet derived growth factor receptor, alpha polypeptide [Source:MGI Symbol;Acc:MGI:97530]	ENSMUSG00000029231	2.34146
Stmn3	stathmin-like 3 [Source:MGI Symbol;Acc:MGI:1277137]	ENSMUSG00000027581	2.33948
Gad1	glutamate decarboxylase 1 [Source:MGI Symbol;Acc:MGI:95632]	ENSMUSG00000070880	2.31317
Pdgfra	platelet derived growth factor receptor, alpha polypeptide [Source:MGI Symbol;Acc:MGI:97530]	ENSMUSG00000029231	2.30956
Slc6a1	solute carrier family 6 (neurotransmitter transporter, GABA), member 1 [Source:MGI Symbol;Acc:MGI:95627]	ENSMUSG00000030310	2.27546
Zfp711	zinc finger protein 711 [Source:MGI Symbol;Acc:MGI:3045342]	ENSMUSG00000025529	2.27381
Eif1a, Gm8300	eukaryotic translation initiation factor 1A [Source:MGI Symbol;Acc:MGI:95298] /// predicted gene 8300 [Source:MGI Symbol;Acc:MGI:3643794]	ENSMUSG00000057561, ENSMUSG00000079034	2.27022
Kdr	kinase insert domain protein receptor [Source:MGI Symbol;Acc:MGI:96683]	ENSMUSG00000062960	2.26467
Pdgfra	platelet derived growth factor receptor, alpha polypeptide [Source:MGI Symbol;Acc:MGI:97530]	ENSMUSG00000029231	2.25929
Plcd4	phospholipase C, delta 4 [Source:MGI Symbol;Acc:MGI:107469]	ENSMUSG00000026173	2.2454
Nobox	NOBOX oogenesis homeobox [Source:MGI Symbol;Acc:MGI:108011]	ENSMUSG00000029736	2.24212
4930528F23Rik	RIKEN cDNA 4930528F23 gene [Source:MGI Symbol;Acc:MGI:1922428]	ENSMUSG00000024155	2.2299
Pdgfra	platelet derived growth factor receptor, alpha polypeptide [Source:MGI Symbol;Acc:MGI:97530]	ENSMUSG00000029231	2.22204
Ccnd2	cyclin D2 [Source:MGI Symbol;Acc:MGI:88314]	ENSMUSG00000000184	2.22042
Tcstv1	2-cell-stage, variable group, member 1 [Source:MGI Symbol;Acc:MGI:1933437]	ENSMUSG00000096284	2.21601
Wdr64	WD repeat domain 64 [Source:MGI Symbol;Acc:MGI:1923070]	ENSMUSG00000026523	2.20425
Adam32	a disintegrin and metallopeptidase domain 32 [Source:MGI Symbol;Acc:MGI:2653822]	ENSMUSG00000037437	2.18134
Hmox1	heme oxygenase (decycling) 1 [Source:MGI Symbol;Acc:MGI:96163]	ENSMUSG00000005413	2.16624
Mir377 (miRNA), Mir541 (miRNA), AC121784.1 (miRNA), Mir412 (miRNA)	microRNA 377 [Source:MGI Symbol;Acc:MGI:3619382] /// microRNA 541 [Source:MGI Symbol;Acc:MGI:3619430] /// -- /// microRNA 412 [Source:MGI Symbol;Acc:MGI:3619400]	ENSMUSG00000065438, ENSMUSG00000076052, ENSMUSG00000093089, ENSMUSG00000065570	2.16521
Dcc	deleted in colorectal carcinoma [Source:MGI Symbol;Acc:MGI:94869]	ENSMUSG00000060534	2.15823
Tbx4	T-box 4 [Source:MGI Symbol;Acc:MGI:102556]	ENSMUSG00000000094	2.14793
Gm10679 (pseudogene), Gm3977 (pseudogene), Gm10678 (pseudogene)	predicted gene 10679 [Source:MGI Symbol;Acc:MGI:3641735] /// predicted gene 3977 [Source:MGI Symbol;Acc:MGI:3782150] /// predicted gene 10678 [Source:MGI Symbol;Acc:MGI:3641736]	ENSMUSG00000095274, ENSMUSG00000095952, ENSMUSG00000093913	2.14749
Gm5662, AC079644.1, CT954323.2, AC211878.1, BB287469, CT030687.1, Gm8300, Gm2075, CT485612.1, Gm4027, Gm10264, Gm2046, Gm2016, Gm2022, AC079644.3, AC079644.2	predicted gene 5662 [Source:MGI Symbol;Acc:MGI:3648257] /// -- /// -- /// -- /// expressed sequence BB287469 [Source:MGI Symbol;Acc:MGI:3034635] /// eukaryotic translation initiation factor 1A-like 2 [Source:RefSeq peptide;Acc:NP_001171036] /// predicted gene 8300 [Source:MGI Symbol;Acc:MGI:3643794] /// predicted pseudogene 2075 [Source:MGI Symbol;Acc:MGI:3780242] /// -- /// predicted gene 4027 […	ENSMUSG00000072905, ENSMUSG00000095265, ENSMUSG00000096619, ENSMUSG00000095724, ENSMUSG00000079031, ENSMUSG00000095799, ENSMUSG00000079034, ENSMUSG00000096049, ENSMUSG00000093847, ENSMUSG00000092019, ENSMUSG00000069276, ENSMUSG00000079030, ENSMUSG00000079029, ENSMUSG00000071217, ENSMUSG00000096803, ENSMUSG00000095717	2.14315
Ccnd2	cyclin D2 [Source:MGI Symbol;Acc:MGI:88314]	ENSMUSG00000000184	2.14092
Ccdc41	coiled-coil domain containing 41 [Source:MGI Symbol;Acc:MGI:1924298]	ENSMUSG00000020024	2.13362
4930447C04Rik	RIKEN cDNA 4930447C04 gene [Source:MGI Symbol;Acc:MGI:1923051]	ENSMUSG00000021098	2.11867
Tcstv1	2-cell-stage, variable group, member 1 [Source:MGI Symbol;Acc:MGI:1933437]	ENSMUSG00000096284	2.11753
Gna14	guanine nucleotide binding protein, alpha 14 [Source:MGI Symbol;Acc:MGI:95769]	ENSMUSG00000024697	2.1139
Pdgfra	platelet derived growth factor receptor, alpha polypeptide [Source:MGI Symbol;Acc:MGI:97530]	ENSMUSG00000029231	2.10346
1600029D21Rik	RIKEN cDNA 1600029D21 gene [Source:MGI Symbol;Acc:MGI:1923759]	ENSMUSG00000032068	2.09084
Kdr	kinase insert domain protein receptor [Source:MGI Symbol;Acc:MGI:96683]	ENSMUSG00000062960	2.08374
Pdgfra	platelet derived growth factor receptor, alpha polypeptide [Source:MGI Symbol;Acc:MGI:97530]	ENSMUSG00000029231	2.07799
Tmem106a	transmembrane protein 106A [Source:MGI Symbol;Acc:MGI:1922056]	ENSMUSG00000034947	2.07158
Pdgfra	platelet derived growth factor receptor, alpha polypeptide [Source:MGI Symbol;Acc:MGI:97530]	ENSMUSG00000029231	2.06886
Dpp4	dipeptidylpeptidase 4 [Source:MGI Symbol;Acc:MGI:94919]	ENSMUSG00000035000	2.06542
Hdc	histidine decarboxylase [Source:MGI Symbol;Acc:MGI:96062]	ENSMUSG00000027360	2.05284
Nkx6-3	NK6 homeobox 3 [Source:MGI Symbol;Acc:MGI:1921811]	ENSMUSG00000063672	2.05073
Tpm1	tropomyosin 1, alpha [Source:MGI Symbol;Acc:MGI:98809]	ENSMUSG00000032366	2.04876
Efhb	EF hand domain family, member B [Source:MGI Symbol;Acc:MGI:3045296]	ENSMUSG00000023931	2.04537
Defa3, Defa17	defensin, alpha, 3 [Source:MGI Symbol;Acc:MGI:94883] /// defensin, alpha, 17 [Source:MGI Symbol;Acc:MGI:1345152]	ENSMUSG00000074440, ENSMUSG00000060208	2.04037
Neurod1	neurogenic differentiation 1 [Source:MGI Symbol;Acc:MGI:1339708]	ENSMUSG00000034701	2.03927
Slfn5	schlafen 5 [Source:MGI Symbol;Acc:MGI:1329004]	ENSMUSG00000054404	2.03912
Nt5e	5' nucleotidase, ecto [Source:MGI Symbol;Acc:MGI:99782]	ENSMUSG00000032420	2.03491
Ccnd2	cyclin D2 [Source:MGI Symbol;Acc:MGI:88314]	ENSMUSG00000000184	2.02573
Gfra3	glial cell line derived neurotrophic factor family receptor alpha 3 [Source:MGI Symbol;Acc:MGI:1201403]	ENSMUSG00000024366	2.02417
Pdha2	pyruvate dehydrogenase E1 alpha 2 [Source:MGI Symbol;Acc:MGI:97533]	ENSMUSG00000047674	2.01706
Pdgfra	platelet derived growth factor receptor, alpha polypeptide [Source:MGI Symbol;Acc:MGI:97530]	ENSMUSG00000029231	2.00965
Id4	inhibitor of DNA binding 4 [Source:MGI Symbol;Acc:MGI:99414]	ENSMUSG00000021379	2.00414
Tc2n	tandem C2 domains, nuclear [Source:MGI Symbol;Acc:MGI:1921663]	ENSMUSG00000021187	2.00236
Chrnb1	cholinergic receptor, nicotinic, beta polypeptide 1 (muscle) [Source:MGI Symbol;Acc:MGI:87890]	ENSMUSG00000041189	1.99872
1700019A02Rik	RIKEN cDNA 1700019A02 gene [Source:MGI Symbol;Acc:MGI:1916647]	ENSMUSG00000060715	1.99504
Afp	alpha fetoprotein [Source:MGI Symbol;Acc:MGI:87951]	ENSMUSG00000054932	1.98601
Afp	alpha fetoprotein [Source:MGI Symbol;Acc:MGI:87951]	ENSMUSG00000054932	1.98535
Setbp1	SET binding protein 1 [Source:MGI Symbol;Acc:MGI:1933199]	ENSMUSG00000024548	1.98425
Sh3kbp1	SH3-domain kinase binding protein 1 [Source:MGI Symbol;Acc:MGI:1889583]	ENSMUSG00000040990	1.97324
AC160982.1 (IG_C_gene)	--	ENSMUSG00000095079	1.96817
Gm15299, Defa3, Defa24, Defa-rs7, Defa-ps1 (pseudogene), Gm15284, Defa23, Defa17, Defa-ps6 (pseudogene)	predicted pseudogene 15299 [Source:MGI Symbol;Acc:MGI:3642780] /// defensin, alpha, 3 [Source:MGI Symbol;Acc:MGI:94883] /// defensin, alpha, 24 [Source:MGI Symbol;Acc:MGI:3630383] /// defensin, alpha, related sequence 7 [Source:MGI Symbol;Acc:MGI:102509] /// defensin, alpha, pseudogene 1 [Source:MGI Symbol;Acc:MGI:3630392] /// predicted gene 15284 [Source:MGI Symbol;Acc:MGI:3808881] /// defensin,…	ENSMUSG00000082211, ENSMUSG00000074440, ENSMUSG00000064213, ENSMUSG00000074442, ENSMUSG00000095813, ENSMUSG00000074444, ENSMUSG00000074446, ENSMUSG00000060208, ENSMUSG00000095328	1.9595
Tmprss5	transmembrane protease, serine 5 (spinesin) [Source:MGI Symbol;Acc:MGI:1933407]	ENSMUSG00000032268	1.95641
Neat1 (non_coding)	nuclear paraspeckle assembly transcript 1 (non-protein coding) [Source:MGI Symbol;Acc:MGI:1914211]	ENSMUSG00000092274	1.95356
Tcstv1	2-cell-stage, variable group, member 1 [Source:MGI Symbol;Acc:MGI:1933437]	ENSMUSG00000096284	1.95306
Dtna	dystrobrevin alpha [Source:MGI Symbol;Acc:MGI:106039]	ENSMUSG00000024302	1.94565
Myl2	myosin, light polypeptide 2, regulatory, cardiac, slow [Source:MGI Symbol;Acc:MGI:97272]	ENSMUSG00000013936	1.94084
Meg3 (lincRNA)	maternally expressed 3 [Source:MGI Symbol;Acc:MGI:1202886]	ENSMUSG00000021268	1.93822
Polr3gl	polymerase (RNA) III (DNA directed) polypeptide G like [Source:MGI Symbol;Acc:MGI:1917120]	ENSMUSG00000028104	1.93742
Icam2	intercellular adhesion molecule 2 [Source:MGI Symbol;Acc:MGI:96394]	ENSMUSG00000001029	1.92488
Slmap	sarcolemma associated protein [Source:MGI Symbol;Acc:MGI:1933549]	ENSMUSG00000021870	1.90889
Nrp2	neuropilin 2 [Source:MGI Symbol;Acc:MGI:1100492]	ENSMUSG00000025969	1.90655
AC238940.3	uncharacterized protein LOC639910 [Source:RefSeq peptide;Acc:NP_001034737]	ENSMUSG00000096323	1.89584
Meg3 (lincRNA)	maternally expressed 3 [Source:MGI Symbol;Acc:MGI:1202886]	ENSMUSG00000021268	1.89487
Eif2c3	eukaryotic translation initiation factor 2C, 3 [Source:MGI Symbol;Acc:MGI:2446634]	ENSMUSG00000028842	1.89356
Nfe2	nuclear factor, erythroid derived 2 [Source:MGI Symbol;Acc:MGI:97308]	ENSMUSG00000058794	1.88535
Hspb3	heat shock protein 3 [Source:MGI Symbol;Acc:MGI:1928479]	ENSMUSG00000051456	1.88031
Kdr	kinase insert domain protein receptor [Source:MGI Symbol;Acc:MGI:96683]	ENSMUSG00000062960	1.87947
Cap2	CAP, adenylate cyclase-associated protein, 2 (yeast) [Source:MGI Symbol;Acc:MGI:1914502]	ENSMUSG00000021373	1.87844
Pdzd2	PDZ domain containing 2 [Source:MGI Symbol;Acc:MGI:1922394]	ENSMUSG00000022197	1.86521
Taf9b	TAF9B RNA polymerase II, TATA box binding protein (TBP)-associated factor [Source:MGI Symbol;Acc:MGI:3039562]	ENSMUSG00000047242	1.86518
Bhlhe23	basic helix-loop-helix family, member e23 [Source:MGI Symbol;Acc:MGI:2153710]	ENSMUSG00000045493	1.85895
Gm8766, Gm4340, Gm8766, Gm6763	predicted gene 8766 [Source:MGI Symbol;Acc:MGI:3643661] /// predicted gene 4340 [Source:MGI Symbol;Acc:MGI:3782524] /// predicted gene 8766 [Source:MGI Symbol;Acc:MGI:3643661] /// predicted gene 6763 [Source:MGI Symbol;Acc:MGI:3643573]	ENSMUSG00000095022, ENSMUSG00000090854, ENSMUSG00000094144, ENSMUSG00000091779	1.85734
Magi3	membrane associated guanylate kinase, WW and PDZ domain containing 3 [Source:MGI Symbol;Acc:MGI:1923484]	ENSMUSG00000052539	1.8551
Ttc30b	tetratricopeptide repeat domain 30B [Source:MGI Symbol;Acc:MGI:1919671]	ENSMUSG00000075273	1.85403
Zfp352	zinc finger protein 352 [Source:MGI Symbol;Acc:MGI:2387418]	ENSMUSG00000070902	1.8529
Apobec2	apolipoprotein B mRNA editing enzyme, catalytic polypeptide 2 [Source:MGI Symbol;Acc:MGI:1343178]	ENSMUSG00000040694	1.84584
Ptprd	protein tyrosine phosphatase, receptor type, D [Source:MGI Symbol;Acc:MGI:97812]	ENSMUSG00000028399	1.84458
Baz2b	bromodomain adjacent to zinc finger domain, 2B [Source:MGI Symbol;Acc:MGI:2442782]	ENSMUSG00000026987	1.84409
Dock10	dedicator of cytokinesis 10 [Source:MGI Symbol;Acc:MGI:2146320]	ENSMUSG00000038608	1.84081
Prkcb	protein kinase C, beta [Source:MGI Symbol;Acc:MGI:97596]	ENSMUSG00000052889	1.83822
Nrcam	neuron-glia-CAM-related cell adhesion molecule [Source:MGI Symbol;Acc:MGI:104750]	ENSMUSG00000020598	1.83657
Gm10264	predicted gene 10264 [Source:MGI Symbol;Acc:MGI:3646909]	ENSMUSG00000069276	1.83493
Afp	alpha fetoprotein [Source:MGI Symbol;Acc:MGI:87951]	ENSMUSG00000054932	1.8348
Zscan4d, Zscan4f	zinc finger and SCAN domain containing 4D [Source:MGI Symbol;Acc:MGI:3645954] /// zinc finger and SCAN domain containing 4F [Source:MGI Symbol;Acc:MGI:3708485]	ENSMUSG00000090714, ENSMUSG00000070828	1.83078
Aldh1a3	aldehyde dehydrogenase family 1, subfamily A3 [Source:MGI Symbol;Acc:MGI:1861722]	ENSMUSG00000015134	1.82316
Fcgr2b	Fc receptor, IgG, low affinity IIb [Source:MGI Symbol;Acc:MGI:95499]	ENSMUSG00000026656	1.82101
Tspan1	tetraspanin 1 [Source:MGI Symbol;Acc:MGI:1914055]	ENSMUSG00000028699	1.81839
Obsl1	obscurin-like 1 [Source:MGI Symbol;Acc:MGI:2138628]	ENSMUSG00000026211	1.81758
Kdr	kinase insert domain protein receptor [Source:MGI Symbol;Acc:MGI:96683]	ENSMUSG00000062960	1.81215
Cachd1	cache domain containing 1 [Source:MGI Symbol;Acc:MGI:2444177]	ENSMUSG00000028532	1.80743
Gm9458 (pseudogene), AC121888.1, Gm5699	predicted gene 9458 [Source:MGI Symbol;Acc:MGI:3779868] /// -- /// predicted gene 5699 [Source:MGI Symbol;Acc:MGI:3648192]	ENSMUSG00000086726, ENSMUSG00000094215, ENSMUSG00000087346	1.80485
BC061212	cDNA sequence BC061212 [Source:MGI Symbol;Acc:MGI:2681870]	ENSMUSG00000072822	1.80132
Clca3	chloride channel calcium activated 3 [Source:MGI Symbol;Acc:MGI:1346342]	ENSMUSG00000028255	1.80039
Gm2016, Gm5662	predicted gene 2016 [Source:MGI Symbol;Acc:MGI:3780185] /// predicted gene 5662 [Source:MGI Symbol;Acc:MGI:3648257]	ENSMUSG00000079029, ENSMUSG00000072905	1.79705
Tmsb4x	thymosin, beta 4, X chromosome [Source:MGI Symbol;Acc:MGI:99510]	ENSMUSG00000049775	1.79413
Hopx	HOP homeobox [Source:MGI Symbol;Acc:MGI:1916782]	ENSMUSG00000059325	1.79365
Kdr	kinase insert domain protein receptor [Source:MGI Symbol;Acc:MGI:96683]	ENSMUSG00000062960	1.78987
BC022960 (pseudogene)	cDNA sequence BC022960 [Source:MGI Symbol;Acc:MGI:2670977]	ENSMUSG00000081137	1.78623
Synj2	synaptojanin 2 [Source:MGI Symbol;Acc:MGI:1201671]	ENSMUSG00000023805	1.78617
Obsl1	obscurin-like 1 [Source:MGI Symbol;Acc:MGI:2138628]	ENSMUSG00000026211	1.78344
Etl4	enhancer trap locus 4 [Source:MGI Symbol;Acc:MGI:95454]	ENSMUSG00000036617	1.77926
Cachd1	cache domain containing 1 [Source:MGI Symbol;Acc:MGI:2444177]	ENSMUSG00000028532	1.77821
Lgals4	lectin, galactose binding, soluble 4 [Source:MGI Symbol;Acc:MGI:107536]	ENSMUSG00000053964	1.77626
Zscan4d	zinc finger and SCAN domain containing 4D [Source:MGI Symbol;Acc:MGI:3645954]	ENSMUSG00000090714	1.77603
Lrrc31	leucine rich repeat containing 31 [Source:MGI Symbol;Acc:MGI:2443864]	ENSMUSG00000074653	1.77126
Cux1	cut-like homeobox 1 [Source:MGI Symbol;Acc:MGI:88568]	ENSMUSG00000029705	1.76486
Tgfbr2	transforming growth factor, beta receptor II [Source:MGI Symbol;Acc:MGI:98729]	ENSMUSG00000032440	1.76422
Kdr	kinase insert domain protein receptor [Source:MGI Symbol;Acc:MGI:96683]	ENSMUSG00000062960	1.76314
Ano9	anoctamin 9 [Source:MGI Symbol;Acc:MGI:1918595]	ENSMUSG00000054662	1.7548
Gm10104, AC239604.1, Gm14850	predicted gene 10104 [Source:MGI Symbol;Acc:MGI:3711900] /// predicted gene 14850 precursor [Source:RefSeq peptide;Acc:NP_001170993] /// predicted gene 14850 [Source:MGI Symbol;Acc:MGI:3705236]	ENSMUSG00000061845, ENSMUSG00000094662, ENSMUSG00000065956	1.7547
Laptm5	lysosomal-associated protein transmembrane 5 [Source:MGI Symbol;Acc:MGI:108046]	ENSMUSG00000028581	1.75405
Epas1	endothelial PAS domain protein 1 [Source:MGI Symbol;Acc:MGI:109169]	ENSMUSG00000024140	1.75305
A430089I19Rik	RIKEN cDNA A430089I19 gene [Source:MGI Symbol;Acc:MGI:2683305]	ENSMUSG00000094560	1.75234
Defa26	defensin, alpha, 26 [Source:MGI Symbol;Acc:MGI:3630390]	ENSMUSG00000060070	1.75186
Hmga2	high mobility group AT-hook 2 [Source:MGI Symbol;Acc:MGI:101761]	ENSMUSG00000056758	1.7506
Cox8c	cytochrome c oxidase, subunit VIIIc [Source:MGI Symbol;Acc:MGI:1922733]	ENSMUSG00000043319	1.74902
Rassf9	Ras association (RalGDS/AF-6) domain family (N-terminal) member 9 [Source:MGI Symbol;Acc:MGI:2384307]	ENSMUSG00000044921	1.74885
Prom1	prominin 1 [Source:MGI Symbol;Acc:MGI:1100886]	ENSMUSG00000029086	1.74837
Olfr507	olfactory receptor 507 [Source:MGI Symbol;Acc:MGI:3030341]	ENSMUSG00000061000	1.74786
Dab1	disabled homolog 1 (Drosophila) [Source:MGI Symbol;Acc:MGI:108554]	ENSMUSG00000028519	1.74285
C1d	C1D nuclear receptor co-repressor [Source:MGI Symbol;Acc:MGI:1927354]	ENSMUSG00000000581	1.74209
AI662270 (lincRNA)	expressed sequence AI662270 [Source:MGI Symbol;Acc:MGI:2144254]	ENSMUSG00000087107	1.7375
Syp	synaptophysin [Source:MGI Symbol;Acc:MGI:98467]	ENSMUSG00000031144	1.73666
Megf11	multiple EGF-like-domains 11 [Source:MGI Symbol;Acc:MGI:1920951]	ENSMUSG00000036466	1.73622
Lrch1	leucine-rich repeats and calponin homology (CH) domain containing 1 [Source:MGI Symbol;Acc:MGI:2443390]	ENSMUSG00000068015	1.73555
Brpf3	bromodomain and PHD finger containing, 3 [Source:MGI Symbol;Acc:MGI:2146836]	ENSMUSG00000063952	1.73083
Dlgap3	discs, large (Drosophila) homolog-associated protein 3 [Source:MGI Symbol;Acc:MGI:3039563]	ENSMUSG00000042388	1.72879
Igf1	insulin-like growth factor 1 [Source:MGI Symbol;Acc:MGI:96432]	ENSMUSG00000020053	1.72833
Nfib	nuclear factor I/B [Source:MGI Symbol;Acc:MGI:103188]	ENSMUSG00000008575	1.72322
Zfp352	zinc finger protein 352 [Source:MGI Symbol;Acc:MGI:2387418]	ENSMUSG00000070902	1.72287
Lgals4	lectin, galactose binding, soluble 4 [Source:MGI Symbol;Acc:MGI:107536]	ENSMUSG00000053964	1.7212
Cnpy1	canopy 1 homolog (zebrafish) [Source:MGI Symbol;Acc:MGI:2442451]	ENSMUSG00000044681	1.71335
Tmem191c	transmembrane protein 191C [Source:MGI Symbol;Acc:MGI:107238]	ENSMUSG00000055692	1.71181
Sp110, AC168977.1, AC147806.1	Sp110 nuclear body protein [Source:MGI Symbol;Acc:MGI:1923364] /// -- /// --	ENSMUSG00000070034, ENSMUSG00000079808, ENSMUSG00000094127	1.71077
Clps	colipase, pancreatic [Source:MGI Symbol;Acc:MGI:88421]	ENSMUSG00000024225	1.70851
Kdr	kinase insert domain protein receptor [Source:MGI Symbol;Acc:MGI:96683]	ENSMUSG00000062960	1.70804
Hipk3	homeodomain interacting protein kinase 3 [Source:MGI Symbol;Acc:MGI:1314882]	ENSMUSG00000027177	1.70586
Baz2b	bromodomain adjacent to zinc finger domain, 2B [Source:MGI Symbol;Acc:MGI:2442782]	ENSMUSG00000026987	1.70046
Phlda1	pleckstrin homology-like domain, family A, member 1 [Source:MGI Symbol;Acc:MGI:1096880]	ENSMUSG00000020205	1.69951
3300002I08Rik	RIKEN cDNA 3300002I08 gene [Source:MGI Symbol;Acc:MGI:1916527]	ENSMUSG00000063364	1.69654
St8sia3	ST8 alpha-N-acetyl-neuraminide alpha-2,8-sialyltransferase 3 [Source:MGI Symbol;Acc:MGI:106019]	ENSMUSG00000056812	1.69474
Scgb3a1	secretoglobin, family 3A, member 1 [Source:MGI Symbol;Acc:MGI:1915912]	ENSMUSG00000064057	1.69467
Kdr	kinase insert domain protein receptor [Source:MGI Symbol;Acc:MGI:96683]	ENSMUSG00000062960	1.69193
Zfp800	zinc finger protein 800 [Source:MGI Symbol;Acc:MGI:1889334]	ENSMUSG00000039841	1.6916
Kdr	kinase insert domain protein receptor [Source:MGI Symbol;Acc:MGI:96683]	ENSMUSG00000062960	1.69098
Atp1b1	ATPase, Na+/K+ transporting, beta 1 polypeptide [Source:MGI Symbol;Acc:MGI:88108]	ENSMUSG00000026576	1.68928
Cd109	CD109 antigen [Source:MGI Symbol;Acc:MGI:2445221]	ENSMUSG00000046186	1.68769
Igf1	insulin-like growth factor 1 [Source:MGI Symbol;Acc:MGI:96432]	ENSMUSG00000020053	1.68681
Id4	inhibitor of DNA binding 4 [Source:MGI Symbol;Acc:MGI:99414]	ENSMUSG00000021379	1.68516
Prom1	prominin 1 [Source:MGI Symbol;Acc:MGI:1100886]	ENSMUSG00000029086	1.68459
Pnlip	pancreatic lipase [Source:MGI Symbol;Acc:MGI:97722]	ENSMUSG00000046008	1.68389
Eef2k	eukaryotic elongation factor-2 kinase [Source:MGI Symbol;Acc:MGI:1195261]	ENSMUSG00000035064	1.68352
Zfp451	zinc finger protein 451 [Source:MGI Symbol;Acc:MGI:2137896]	ENSMUSG00000042197	1.68351
Zfp266	zinc finger protein 266 [Source:MGI Symbol;Acc:MGI:1924769]	ENSMUSG00000060510	1.68319
Tcam1	testicular cell adhesion molecule 1 [Source:MGI Symbol;Acc:MGI:1923120]	ENSMUSG00000020712	1.68209
Afp	alpha fetoprotein [Source:MGI Symbol;Acc:MGI:87951]	ENSMUSG00000054932	1.67635
Wdr70	WD repeat domain 70 [Source:MGI Symbol;Acc:MGI:1921020]	ENSMUSG00000039828	1.67544
Mtmr11	myotubularin related protein 11 [Source:MGI Symbol;Acc:MGI:2652817]	ENSMUSG00000045934	1.67181
Apoc2	apolipoprotein C-II [Source:MGI Symbol;Acc:MGI:88054]	ENSMUSG00000002992	1.66975
Stambpl1	STAM binding protein like 1 [Source:MGI Symbol;Acc:MGI:1923880]	ENSMUSG00000024776	1.66866
Gabrb3	gamma-aminobutyric acid (GABA) A receptor, subunit beta 3 [Source:MGI Symbol;Acc:MGI:95621]	ENSMUSG00000033676	1.66862
Olfr55	olfactory receptor 55 [Source:MGI Symbol;Acc:MGI:1333751]	ENSMUSG00000094891	1.66716
Anp32a	acidic (leucine-rich) nuclear phosphoprotein 32 family, member A [Source:MGI Symbol;Acc:MGI:108447]	ENSMUSG00000032249	1.66589
Flt1	FMS-like tyrosine kinase 1 [Source:MGI Symbol;Acc:MGI:95558]	ENSMUSG00000029648	1.66274
AC153928.2 (IG_V_gene)	--	ENSMUSG00000095338	1.66223
Taf7l	TAF7-like RNA polymerase II, TATA box binding protein (TBP)-associated factor [Source:MGI Symbol;Acc:MGI:1921719]	ENSMUSG00000009596	1.66156
Cplx1	complexin 1 [Source:MGI Symbol;Acc:MGI:104727]	ENSMUSG00000033615	1.66154
Slmap	sarcolemma associated protein [Source:MGI Symbol;Acc:MGI:1933549]	ENSMUSG00000021870	1.6615
1810011O10Rik	RIKEN cDNA 1810011O10 gene [Source:MGI Symbol;Acc:MGI:1916318]	ENSMUSG00000056313	1.65962
Baz1a	bromodomain adjacent to zinc finger domain 1A [Source:MGI Symbol;Acc:MGI:1309478]	ENSMUSG00000035021	1.65848
Bhmt2	betaine-homocysteine methyltransferase 2 [Source:MGI Symbol;Acc:MGI:1891379]	ENSMUSG00000042118	1.65401
Kirrel2	kin of IRRE like 2 (Drosophila) [Source:MGI Symbol;Acc:MGI:2442334]	ENSMUSG00000036915	1.6529
Ica1	islet cell autoantigen 1 [Source:MGI Symbol;Acc:MGI:96391]	ENSMUSG00000062995	1.65279
Baz1a	bromodomain adjacent to zinc finger domain 1A [Source:MGI Symbol;Acc:MGI:1309478]	ENSMUSG00000035021	1.65266
Foxo3	forkhead box O3 [Source:MGI Symbol;Acc:MGI:1890081]	ENSMUSG00000048756	1.6521
Alpk3	alpha-kinase 3 [Source:MGI Symbol;Acc:MGI:2151224]	ENSMUSG00000038763	1.65163
Ccl27a, Gm2506, CT868723.1, Gm13306, Ccl27b	chemokine (C-C motif) ligand 27A [Source:MGI Symbol;Acc:MGI:1343459] /// predicted gene 2506 [Source:MGI Symbol;Acc:MGI:3780673] /// C-C motif chemokine 27 [Source:UniProtKB/Swiss-Prot;Acc:Q9Z1X0] /// predicted gene 13306 [Source:MGI Symbol;Acc:MGI:3713752] /// chemokine (C-C motif) ligand 27b [Source:MGI Symbol;Acc:MGI:1891389]	ENSMUSG00000073888, ENSMUSG00000095247, ENSMUSG00000093828, ENSMUSG00000073877, ENSMUSG00000096826	1.64861
Hormad2	HORMA domain containing 2 [Source:MGI Symbol;Acc:MGI:1923078]	ENSMUSG00000020419	1.64802
Lcorl	ligand dependent nuclear receptor corepressor-like [Source:MGI Symbol;Acc:MGI:2651932]	ENSMUSG00000015882	1.64536
Otud7a	OTU domain containing 7A [Source:MGI Symbol;Acc:MGI:2158505]	ENSMUSG00000033510	1.64516
Dpp4	dipeptidylpeptidase 4 [Source:MGI Symbol;Acc:MGI:94919]	ENSMUSG00000035000	1.64506
Vegfc	vascular endothelial growth factor C [Source:MGI Symbol;Acc:MGI:109124]	ENSMUSG00000031520	1.64347
Nbea	neurobeachin [Source:MGI Symbol;Acc:MGI:1347075]	ENSMUSG00000027799	1.64288
Pitpnc1	phosphatidylinositol transfer protein, cytoplasmic 1 [Source:MGI Symbol;Acc:MGI:1919045]	ENSMUSG00000040430	1.64237
Prickle1	prickle homolog 1 (Drosophila) [Source:MGI Symbol;Acc:MGI:1916034]	ENSMUSG00000036158	1.63998
Cadm1	cell adhesion molecule 1 [Source:MGI Symbol;Acc:MGI:1889272]	ENSMUSG00000032076	1.63909
Calml4	calmodulin-like 4 [Source:MGI Symbol;Acc:MGI:1922850]	ENSMUSG00000032246	1.63656
1700001P01Rik	RIKEN cDNA 1700001P01 gene [Source:MGI Symbol;Acc:MGI:1919465]	ENSMUSG00000018543	1.63636
Fos	FBJ osteosarcoma oncogene [Source:MGI Symbol;Acc:MGI:95574]	ENSMUSG00000021250	1.63595
Sorl1	sortilin-related receptor, LDLR class A repeats-containing [Source:MGI Symbol;Acc:MGI:1202296]	ENSMUSG00000049313	1.63479
Gpatch2	G patch domain containing 2 [Source:MGI Symbol;Acc:MGI:1915019]	ENSMUSG00000039210	1.63348
Igf1	insulin-like growth factor 1 [Source:MGI Symbol;Acc:MGI:96432]	ENSMUSG00000020053	1.62959
Rffl	ring finger and FYVE like domain containing protein [Source:MGI Symbol;Acc:MGI:1914588]	ENSMUSG00000020696	1.62869
Mapt	microtubule-associated protein tau [Source:MGI Symbol;Acc:MGI:97180]	ENSMUSG00000018411	1.62869
Pif1	PIF1 5'-to-3' DNA helicase homolog (S. cerevisiae) [Source:MGI Symbol;Acc:MGI:2143057]	ENSMUSG00000041064	1.62791
Grm5	glutamate receptor, metabotropic 5 [Source:MGI Symbol;Acc:MGI:1351342]	ENSMUSG00000049583	1.62788
Il10rb	interleukin 10 receptor, beta [Source:MGI Symbol;Acc:MGI:109380]	ENSMUSG00000022969	1.62759
Uhrf2	ubiquitin-like, containing PHD and RING finger domains 2 [Source:MGI Symbol;Acc:MGI:1923718]	ENSMUSG00000024817	1.62673
Spnb1	spectrin beta 1 [Source:MGI Symbol;Acc:MGI:98387]	ENSMUSG00000021061	1.62621
Krt20	keratin 20 [Source:MGI Symbol;Acc:MGI:1914059]	ENSMUSG00000035775	1.62603
Bdh1	3-hydroxybutyrate dehydrogenase, type 1 [Source:MGI Symbol;Acc:MGI:1919161]	ENSMUSG00000046598	1.6236
Nkx2-4	NK2 transcription factor related, locus 4 (Drosophila) [Source:MGI Symbol;Acc:MGI:97349]	ENSMUSG00000054160	1.62264
Arxes2	adipocyte-related X-chromosome expressed sequence 2 [Source:MGI Symbol;Acc:MGI:1924226]	ENSMUSG00000048040	1.62239
Fgd5	FYVE, RhoGEF and PH domain containing 5 [Source:MGI Symbol;Acc:MGI:2443369]	ENSMUSG00000034037	1.622
Pipox	pipecolic acid oxidase [Source:MGI Symbol;Acc:MGI:1197006]	ENSMUSG00000017453	1.62183
4930447C04Rik	RIKEN cDNA 4930447C04 gene [Source:MGI Symbol;Acc:MGI:1923051]	ENSMUSG00000021098	1.62073
Gm9805	predicted gene 9805 [Source:MGI Symbol;Acc:MGI:3642566]	ENSMUSG00000046088	1.61986
Atp1a4	ATPase, Na+/K+ transporting, alpha 4 polypeptide [Source:MGI Symbol;Acc:MGI:1351335]	ENSMUSG00000007107	1.61969
Crygn	crystallin, gamma N [Source:MGI Symbol;Acc:MGI:2449167]	ENSMUSG00000038135	1.61959
Fam190a	family with sequence similarity 190, member A [Source:MGI Symbol;Acc:MGI:3045354]	ENSMUSG00000039578	1.61867
Mll5	myeloid/lymphoid or mixed-lineage leukemia 5 [Source:MGI Symbol;Acc:MGI:1924825]	ENSMUSG00000029004	1.61743
Ctss	cathepsin S [Source:MGI Symbol;Acc:MGI:107341]	ENSMUSG00000038642	1.61735
2410002O22Rik, 2410002O22Rik	RIKEN cDNA 2410002O22 gene [Source:MGI Symbol;Acc:MGI:1914225] /// RIKEN cDNA 2410002O22 gene [Source:MGI Symbol;Acc:MGI:1914225]	ENSMUSG00000021711, ENSMUSG00000078936	1.61669
Slc26a10	solute carrier family 26, member 10 [Source:MGI Symbol;Acc:MGI:2143920]	ENSMUSG00000040441	1.61516
Slc1a3	solute carrier family 1 (glial high affinity glutamate transporter), member 3 [Source:MGI Symbol;Acc:MGI:99917]	ENSMUSG00000005360	1.61429
Abca1	ATP-binding cassette, sub-family A (ABC1), member 1 [Source:MGI Symbol;Acc:MGI:99607]	ENSMUSG00000015243	1.61272
Bahd1	bromo adjacent homology domain containing 1 [Source:MGI Symbol;Acc:MGI:2139371]	ENSMUSG00000040007	1.60939
Eif4a2	eukaryotic translation initiation factor 4A2 [Source:MGI Symbol;Acc:MGI:106906]	ENSMUSG00000022884	1.6089
Malat1 (lincRNA)	metastasis associated lung adenocarcinoma transcript 1 (non-coding RNA) [Source:MGI Symbol;Acc:MGI:1919539]	ENSMUSG00000092341	1.60838
Acpp	acid phosphatase, prostate [Source:MGI Symbol;Acc:MGI:1928480]	ENSMUSG00000032561	1.60834
Sp140, AC125149.3, A530040E14Rik (antisense), AC133103.1, A530032D15Rik, C130026I21Rik	Sp140 nuclear body protein [Source:MGI Symbol;Acc:MGI:3702467] /// Putative uncharacterized protein [Source:UniProtKB/TrEMBL;Acc:Q3TR44] /// RIKEN cDNA A530040E14 gene [Source:MGI Symbol;Acc:MGI:3612703] /// -- /// RIKEN cDNA A530032D15Rik gene [Source:MGI Symbol;Acc:MGI:3037746] /// RIKEN cDNA C130026I21 gene [Source:MGI Symbol;Acc:MGI:3612702]	ENSMUSG00000070031, ENSMUSG00000079800, ENSMUSG00000072109, ENSMUSG00000079190, ENSMUSG00000089844, ENSMUSG00000052477	1.60827
Slc35d1	solute carrier family 35 (UDP-glucuronic acid/UDP-N-acetylgalactosamine dual transporter), member D1 [Source:MGI Symbol;Acc:MGI:2140361]	ENSMUSG00000028521	1.60695
Zfp148	zinc finger protein 148 [Source:MGI Symbol;Acc:MGI:1332234]	ENSMUSG00000022811	1.60573
Ppapdc2	phosphatidic acid phosphatase type 2 domain containing 2 [Source:MGI Symbol;Acc:MGI:1921661]	ENSMUSG00000040105	1.60524
Fam129a	family with sequence similarity 129, member A [Source:MGI Symbol;Acc:MGI:2137237]	ENSMUSG00000026483	1.60435
Ppm1e	protein phosphatase 1E (PP2C domain containing) [Source:MGI Symbol;Acc:MGI:2444096]	ENSMUSG00000046442	1.60404
Mtap2	microtubule-associated protein 2 [Source:MGI Symbol;Acc:MGI:97175]	ENSMUSG00000015222	1.60378
Igf2bp2	insulin-like growth factor 2 mRNA binding protein 2 [Source:MGI Symbol;Acc:MGI:1890358]	ENSMUSG00000033581	1.60287
Usp49	ubiquitin specific peptidase 49 [Source:MGI Symbol;Acc:MGI:2685391]	ENSMUSG00000090115	1.60212
Crybg3, Mina	beta-gamma crystallin domain containing 3 [Source:MGI Symbol;Acc:MGI:2676311] /// myc induced nuclear antigen [Source:MGI Symbol;Acc:MGI:1914264]	ENSMUSG00000022723, ENSMUSG00000022724	1.60176
Celf6	CUGBP, Elav-like family member 6 [Source:MGI Symbol;Acc:MGI:1923433]	ENSMUSG00000032297	1.60149
Cd109	CD109 antigen [Source:MGI Symbol;Acc:MGI:2445221]	ENSMUSG00000046186	1.60131
Prmt8	protein arginine N-methyltransferase 8 [Source:MGI Symbol;Acc:MGI:3043083]	ENSMUSG00000030350	1.60076
Mbnl1	muscleblind-like 1 (Drosophila) [Source:MGI Symbol;Acc:MGI:1928482]	ENSMUSG00000027763	1.60029
mt-Nd4	mitochondrially encoded NADH dehydrogenase 4 [Source:MGI Symbol;Acc:MGI:102498]	ENSMUSG00000064363	1.59835
Tmem82, AI507597 (antisense)	transmembrane protein 82 [Source:MGI Symbol;Acc:MGI:2384869] /// expressed sequence AI507597 [Source:MGI Symbol;Acc:MGI:2140323]	ENSMUSG00000043085, ENSMUSG00000073731	1.59787
Ptpn13	protein tyrosine phosphatase, non-receptor type 13 [Source:MGI Symbol;Acc:MGI:103293]	ENSMUSG00000034573	1.59434
Tmem213	transmembrane protein 213 [Source:MGI Symbol;Acc:MGI:1924772]	ENSMUSG00000029829	1.59359
Olfr1384	olfactory receptor 1384 [Source:MGI Symbol;Acc:MGI:3031218]	ENSMUSG00000044170	1.59211
Fam102a	family with sequence similarity 102, member A [Source:MGI Symbol;Acc:MGI:2138935]	ENSMUSG00000039157	1.59111
Plekhh1	pleckstrin homology domain containing, family H (with MyTH4 domain) member 1 [Source:MGI Symbol;Acc:MGI:2144989]	ENSMUSG00000060716	1.59099
Taf7l	TAF7-like RNA polymerase II, TATA box binding protein (TBP)-associated factor [Source:MGI Symbol;Acc:MGI:1921719]	ENSMUSG00000009596	1.58991
Dner	delta/notch-like EGF-related receptor [Source:MGI Symbol;Acc:MGI:2152889]	ENSMUSG00000036766	1.58983
Fbp2	fructose bisphosphatase 2 [Source:MGI Symbol;Acc:MGI:95491]	ENSMUSG00000021456	1.58921
Slc12a8	solute carrier family 12 (potassium/chloride transporters), member 8 [Source:MGI Symbol;Acc:MGI:2443672]	ENSMUSG00000035506	1.58815
Scamp1	secretory carrier membrane protein 1 [Source:MGI Symbol;Acc:MGI:1349480]	ENSMUSG00000021687	1.58746
C77370	expressed sequence C77370 [Source:MGI Symbol;Acc:MGI:2148050]	ENSMUSG00000046449	1.58532
Fam154b	family with sequence similarity 154, member B [Source:MGI Symbol;Acc:MGI:1914618]	ENSMUSG00000038570	1.58524
Phactr1	phosphatase and actin regulator 1 [Source:MGI Symbol;Acc:MGI:2659021]	ENSMUSG00000054728	1.58502
Zfp521	zinc finger protein 521 [Source:MGI Symbol;Acc:MGI:95459]	ENSMUSG00000024420	1.58242
Trib1	tribbles homolog 1 (Drosophila) [Source:MGI Symbol;Acc:MGI:2443397]	ENSMUSG00000032501	1.58182
Fxyd4, AC153918.1 (miRNA)	FXYD domain-containing ion transport regulator 4 [Source:MGI Symbol;Acc:MGI:1889005] /// --	ENSMUSG00000004988, ENSMUSG00000093105	1.58144
Scml2	sex comb on midleg-like 2 (Drosophila) [Source:MGI Symbol;Acc:MGI:1340042]	ENSMUSG00000000037	1.58119
Pard3	par-3 (partitioning defective 3) homolog (C. elegans) [Source:MGI Symbol;Acc:MGI:2135608]	ENSMUSG00000025812	1.57993
Atf2	activating transcription factor 2 [Source:MGI Symbol;Acc:MGI:109349]	ENSMUSG00000027104	1.57962
Fstl1	follistatin-like 1 [Source:MGI Symbol;Acc:MGI:102793]	ENSMUSG00000022816	1.57931
Papola	poly (A) polymerase alpha [Source:MGI Symbol;Acc:MGI:109301]	ENSMUSG00000021111	1.57875
Cth	cystathionase (cystathionine gamma-lyase) [Source:MGI Symbol;Acc:MGI:1339968]	ENSMUSG00000028179	1.57827
Dst	dystonin [Source:MGI Symbol;Acc:MGI:104627]	ENSMUSG00000026131	1.5771
Zfp385b	zinc finger protein 385B [Source:MGI Symbol;Acc:MGI:2444734]	ENSMUSG00000027016	1.57702
Trib2	tribbles homolog 2 (Drosophila) [Source:MGI Symbol;Acc:MGI:2145021]	ENSMUSG00000020601	1.57615
Pura	purine rich element binding protein A [Source:MGI Symbol;Acc:MGI:103079]	ENSMUSG00000043991	1.57505
Dact1	dapper homolog 1, antagonist of beta-catenin (xenopus) [Source:MGI Symbol;Acc:MGI:1891740]	ENSMUSG00000044548	1.5744
Csrnp2	cysteine-serine-rich nuclear protein 2 [Source:MGI Symbol;Acc:MGI:2386852]	ENSMUSG00000044636	1.5742
Acss1	acyl-CoA synthetase short-chain family member 1 [Source:MGI Symbol;Acc:MGI:1915988]	ENSMUSG00000027452	1.57412
Dnajc6	DnaJ (Hsp40) homolog, subfamily C, member 6 [Source:MGI Symbol;Acc:MGI:1919935]	ENSMUSG00000028528	1.57275
Sgk1	serum/glucocorticoid regulated kinase 1 [Source:MGI Symbol;Acc:MGI:1340062]	ENSMUSG00000019970	1.57229
Rnf128	ring finger protein 128 [Source:MGI Symbol;Acc:MGI:1914139]	ENSMUSG00000031438	1.57212
BC028528	cDNA sequence BC028528 [Source:MGI Symbol;Acc:MGI:2385885]	ENSMUSG00000038543	1.57196
Fcgr2b	Fc receptor, IgG, low affinity IIb [Source:MGI Symbol;Acc:MGI:95499]	ENSMUSG00000026656	1.57056
Gpa33	glycoprotein A33 (transmembrane) [Source:MGI Symbol;Acc:MGI:1891703]	ENSMUSG00000000544	1.5681
Jun	Jun oncogene [Source:MGI Symbol;Acc:MGI:96646]	ENSMUSG00000052684	1.56715
Kdr	kinase insert domain protein receptor [Source:MGI Symbol;Acc:MGI:96683]	ENSMUSG00000062960	1.56693
Igf1	insulin-like growth factor 1 [Source:MGI Symbol;Acc:MGI:96432]	ENSMUSG00000020053	1.5666
Limch1	LIM and calponin homology domains 1 [Source:MGI Symbol;Acc:MGI:1924819]	ENSMUSG00000037736	1.56649
Tax1bp1, Jazf1	Tax1 (human T cell leukemia virus type I) binding protein 1 [Source:MGI Symbol;Acc:MGI:1289308] /// JAZF zinc finger 1 [Source:MGI Symbol;Acc:MGI:2141450]	ENSMUSG00000004535, ENSMUSG00000063568	1.56609
Insc	inscuteable homolog (Drosophila) [Source:MGI Symbol;Acc:MGI:1917942]	ENSMUSG00000048782	1.56485
Jun	Jun oncogene [Source:MGI Symbol;Acc:MGI:96646]	ENSMUSG00000052684	1.5639
Rtn4	reticulon 4 [Source:MGI Symbol;Acc:MGI:1915835]	ENSMUSG00000020458	1.56302
Ripk1	receptor (TNFRSF)-interacting serine-threonine kinase 1 [Source:MGI Symbol;Acc:MGI:108212]	ENSMUSG00000021408	1.5627
Inhbc	inhibin beta-C [Source:MGI Symbol;Acc:MGI:105932]	ENSMUSG00000025405	1.56214
Hormad1	HORMA domain containing 1 [Source:MGI Symbol;Acc:MGI:1915231]	ENSMUSG00000028109	1.56142
2610524H06Rik	RIKEN cDNA 2610524H06 gene [Source:MGI Symbol;Acc:MGI:2447819]	ENSMUSG00000092486	1.56069
Erbb2ip	Erbb2 interacting protein [Source:MGI Symbol;Acc:MGI:1890169]	ENSMUSG00000021709	1.5605
Fam46a	family with sequence similarity 46, member A [Source:MGI Symbol;Acc:MGI:2670964]	ENSMUSG00000032265	1.55879
Cntln	centlein, centrosomal protein [Source:MGI Symbol;Acc:MGI:2443104]	ENSMUSG00000038070	1.55735
1700001P01Rik	RIKEN cDNA 1700001P01 gene [Source:MGI Symbol;Acc:MGI:1919465]	ENSMUSG00000018543	1.55459
Mllt11	myeloid/lymphoid or mixed-lineage leukemia (trithorax homolog, Drosophila); translocated to, 11 [Source:MGI Symbol;Acc:MGI:1929671]	ENSMUSG00000053192	1.55448
Gm1631	predicted gene 1631 [Source:MGI Symbol;Acc:MGI:2686477]	ENSMUSG00000064263	1.55297
Napepld	N-acyl phosphatidylethanolamine phospholipase D [Source:MGI Symbol;Acc:MGI:2140885]	ENSMUSG00000044968	1.5499
Tnik	TRAF2 and NCK interacting kinase [Source:MGI Symbol;Acc:MGI:1916264]	ENSMUSG00000027692	1.54984
Morn3	MORN repeat containing 3 [Source:MGI Symbol;Acc:MGI:1922140]	ENSMUSG00000029477	1.54982
Gfod1	glucose-fructose oxidoreductase domain containing 1 [Source:MGI Symbol;Acc:MGI:2145304]	ENSMUSG00000051335	1.54972
8430410A17Rik	RIKEN cDNA 8430410A17 gene [Source:MGI Symbol;Acc:MGI:1914053]	ENSMUSG00000030060	1.54896
Igfbp7	insulin-like growth factor binding protein 7 [Source:MGI Symbol;Acc:MGI:1352480]	ENSMUSG00000036256	1.54876
mt-Co2	mitochondrially encoded cytochrome c oxidase II [Source:MGI Symbol;Acc:MGI:102503]	ENSMUSG00000064354	1.54866
Ccbl2	cysteine conjugate-beta lyase 2 [Source:MGI Symbol;Acc:MGI:2677849]	ENSMUSG00000040213	1.54638
Mov10	Moloney leukemia virus 10 [Source:MGI Symbol;Acc:MGI:97054]	ENSMUSG00000002227	1.54418
Lrp4	low density lipoprotein receptor-related protein 4 [Source:MGI Symbol;Acc:MGI:2442252]	ENSMUSG00000027253	1.54335
8430427H17Rik	RIKEN cDNA 8430427H17 gene [Source:MGI Symbol;Acc:MGI:1918765]	ENSMUSG00000061411	1.54311
Ccdc158	coiled-coil domain containing 158 [Source:MGI Symbol;Acc:MGI:2444555]	ENSMUSG00000050050	1.543
Dock4	dedicator of cytokinesis 4 [Source:MGI Symbol;Acc:MGI:1918006]	ENSMUSG00000035954	1.54233
Cpne8	copine VIII [Source:MGI Symbol;Acc:MGI:1914121]	ENSMUSG00000052560	1.54225
Kcnip2	Kv channel-interacting protein 2 [Source:MGI Symbol;Acc:MGI:2135916]	ENSMUSG00000025221	1.54153
Slc16a6	solute carrier family 16 (monocarboxylic acid transporters), member 6 [Source:MGI Symbol;Acc:MGI:2144585]	ENSMUSG00000041920	1.54035
F2rl1	coagulation factor II (thrombin) receptor-like 1 [Source:MGI Symbol;Acc:MGI:101910]	ENSMUSG00000021678	1.53982
Tmem191c	transmembrane protein 191C [Source:MGI Symbol;Acc:MGI:107238]	ENSMUSG00000055692	1.53953
Chgb	chromogranin B [Source:MGI Symbol;Acc:MGI:88395]	ENSMUSG00000027350	1.5395
Etv4	ets variant gene 4 (E1A enhancer binding protein, E1AF) [Source:MGI Symbol;Acc:MGI:99423]	ENSMUSG00000017724	1.5395
Bmper	BMP-binding endothelial regulator [Source:MGI Symbol;Acc:MGI:1920480]	ENSMUSG00000031963	1.53901
Arhgap33	Rho GTPase activating protein 33 [Source:MGI Symbol;Acc:MGI:2673998]	ENSMUSG00000036882	1.53859
Tmem145	transmembrane protein 145 [Source:MGI Symbol;Acc:MGI:3607779]	ENSMUSG00000043843	1.53847
Ogt	O-linked N-acetylglucosamine (GlcNAc) transferase (UDP-N-acetylglucosamine:polypeptide-N-acetylglucosaminyl transferase) [Source:MGI Symbol;Acc:MGI:1339639]	ENSMUSG00000034160	1.53739
Sh3kbp1	SH3-domain kinase binding protein 1 [Source:MGI Symbol;Acc:MGI:1889583]	ENSMUSG00000040990	1.53557
Atad2	ATPase family, AAA domain containing 2 [Source:MGI Symbol;Acc:MGI:1917722]	ENSMUSG00000022360	1.53467
Zic2	zinc finger protein of the cerebellum 2 [Source:MGI Symbol;Acc:MGI:106679]	ENSMUSG00000061524	1.53446
Bdnf	brain derived neurotrophic factor [Source:MGI Symbol;Acc:MGI:88145]	ENSMUSG00000048482	1.53399
mt-Nd5	mitochondrially encoded NADH dehydrogenase 5 [Source:MGI Symbol;Acc:MGI:102496]	ENSMUSG00000064367	1.53373
Dab1	disabled homolog 1 (Drosophila) [Source:MGI Symbol;Acc:MGI:108554]	ENSMUSG00000028519	1.53347
Synj2, Serac1	synaptojanin 2 [Source:MGI Symbol;Acc:MGI:1201671] /// serine active site containing 1 [Source:MGI Symbol;Acc:MGI:2447813]	ENSMUSG00000023805, ENSMUSG00000015659	1.53335
Slc6a8	solute carrier family 6 (neurotransmitter transporter, creatine), member 8 [Source:MGI Symbol;Acc:MGI:2147834]	ENSMUSG00000019558	1.53254
2310030G06Rik	RIKEN cDNA 2310030G06 gene [Source:MGI Symbol;Acc:MGI:1914202]	ENSMUSG00000032062	1.53232
Ppargc1b	peroxisome proliferative activated receptor, gamma, coactivator 1 beta [Source:MGI Symbol;Acc:MGI:2444934]	ENSMUSG00000033871	1.53165
Ap3b1	adaptor-related protein complex 3, beta 1 subunit [Source:MGI Symbol;Acc:MGI:1333879]	ENSMUSG00000021686	1.53036
Msln	mesothelin [Source:MGI Symbol;Acc:MGI:1888992]	ENSMUSG00000063011	1.52898
Meg3 (lincRNA)	maternally expressed 3 [Source:MGI Symbol;Acc:MGI:1202886]	ENSMUSG00000021268	1.52837
Igf1	insulin-like growth factor 1 [Source:MGI Symbol;Acc:MGI:96432]	ENSMUSG00000020053	1.52785
Hsbp1l1	heat shock factor binding protein 1-like 1 [Source:MGI Symbol;Acc:MGI:1913505]	ENSMUSG00000078963	1.52754
Snap91	synaptosomal-associated protein 91 [Source:MGI Symbol;Acc:MGI:109132]	ENSMUSG00000033419	1.52654
Fzd6	frizzled homolog 6 (Drosophila) [Source:MGI Symbol;Acc:MGI:108474]	ENSMUSG00000022297	1.52561
Rpl24	ribosomal protein L24 [Source:MGI Symbol;Acc:MGI:1915443]	ENSMUSG00000022601	1.52486
Cttnbp2	cortactin binding protein 2 [Source:MGI Symbol;Acc:MGI:1353467]	ENSMUSG00000000416	1.5247
Homer1	homer homolog 1 (Drosophila) [Source:MGI Symbol;Acc:MGI:1347345]	ENSMUSG00000007617	1.52456
Slit2	slit homolog 2 (Drosophila) [Source:MGI Symbol;Acc:MGI:1315205]	ENSMUSG00000031558	1.52446
Ptpn13	protein tyrosine phosphatase, non-receptor type 13 [Source:MGI Symbol;Acc:MGI:103293]	ENSMUSG00000034573	1.52406
Matn3	matrilin 3 [Source:MGI Symbol;Acc:MGI:1328350]	ENSMUSG00000020583	1.52275
Ncoa7	nuclear receptor coactivator 7 [Source:MGI Symbol;Acc:MGI:2444847]	ENSMUSG00000039697	1.52196
Tead4	TEA domain family member 4 [Source:MGI Symbol;Acc:MGI:106907]	ENSMUSG00000030353	1.52136
Ttll6	tubulin tyrosine ligase-like family, member 6 [Source:MGI Symbol;Acc:MGI:2683461]	ENSMUSG00000038756	1.52105
Cpne8	copine VIII [Source:MGI Symbol;Acc:MGI:1914121]	ENSMUSG00000052560	1.52069
Cgnl1	cingulin-like 1 [Source:MGI Symbol;Acc:MGI:1915428]	ENSMUSG00000032232	1.52037
Dner	delta/notch-like EGF-related receptor [Source:MGI Symbol;Acc:MGI:2152889]	ENSMUSG00000036766	1.52031
St8sia6	ST8 alpha-N-acetyl-neuraminide alpha-2,8-sialyltransferase 6 [Source:MGI Symbol;Acc:MGI:2386797]	ENSMUSG00000003418	1.52007
Ntn1	netrin 1 [Source:MGI Symbol;Acc:MGI:105088]	ENSMUSG00000020902	1.5199
Oasl1	2'-5' oligoadenylate synthetase-like 1 [Source:MGI Symbol;Acc:MGI:2180849]	ENSMUSG00000041827	1.51989
Ecscr	endothelial cell surface expressed chemotaxis and apoptosis regulator [Source:MGI Symbol;Acc:MGI:1915795]	ENSMUSG00000073599	1.51932
Rhobtb1	Rho-related BTB domain containing 1 [Source:MGI Symbol;Acc:MGI:1916538]	ENSMUSG00000019944	1.51894
Pard3	par-3 (partitioning defective 3) homolog (C. elegans) [Source:MGI Symbol;Acc:MGI:2135608]	ENSMUSG00000025812	1.51874
Tpm1	tropomyosin 1, alpha [Source:MGI Symbol;Acc:MGI:98809]	ENSMUSG00000032366	1.51853
mt-Cytb	mitochondrially encoded cytochrome b [Source:MGI Symbol;Acc:MGI:102501]	ENSMUSG00000064370	1.51842
Anxa7	annexin A7 [Source:MGI Symbol;Acc:MGI:88031]	ENSMUSG00000021814	1.51835
Osta	organic solute transporter alpha [Source:MGI Symbol;Acc:MGI:2146634]	ENSMUSG00000035699	1.51771
Spty2d1	SPT2, Suppressor of Ty, domain containing 1 (S. cerevisiae) [Source:MGI Symbol;Acc:MGI:2142062]	ENSMUSG00000049516	1.51725
Akap11	A kinase (PRKA) anchor protein 11 [Source:MGI Symbol;Acc:MGI:2684060]	ENSMUSG00000022016	1.51713
Ccdc39	coiled-coil domain containing 39 [Source:MGI Symbol;Acc:MGI:1289263]	ENSMUSG00000027676	1.51711
Tmem30b	transmembrane protein 30B [Source:MGI Symbol;Acc:MGI:2442082]	ENSMUSG00000034435	1.51642
Chgb	chromogranin B [Source:MGI Symbol;Acc:MGI:88395]	ENSMUSG00000027350	1.51628
Rnf213	ring finger protein 213 [Source:MGI Symbol;Acc:MGI:1289196]	ENSMUSG00000070327	1.51601
Bst1	bone marrow stromal cell antigen 1 [Source:MGI Symbol;Acc:MGI:105370]	ENSMUSG00000029082	1.51476
Ttc28	tetratricopeptide repeat domain 28 [Source:MGI Symbol;Acc:MGI:2140873]	ENSMUSG00000033209	1.51318
Dnahc2	dynein, axonemal, heavy chain 2 [Source:MGI Symbol;Acc:MGI:107731]	ENSMUSG00000005237	1.51186
Trim67	tripartite motif-containing 67 [Source:MGI Symbol;Acc:MGI:3045323]	ENSMUSG00000036913	1.51185
Fut9	fucosyltransferase 9 [Source:MGI Symbol;Acc:MGI:1330859]	ENSMUSG00000055373	1.51112
H2-Oa	histocompatibility 2, O region alpha locus [Source:MGI Symbol;Acc:MGI:95924]	ENSMUSG00000024334	1.51087
Npb	neuropeptide B [Source:MGI Symbol;Acc:MGI:2387153]	ENSMUSG00000044034	1.51037
Tspan1	tetraspanin 1 [Source:MGI Symbol;Acc:MGI:1914055]	ENSMUSG00000028699	1.51001
Cdc42	cell division cycle 42 homolog (S. cerevisiae) [Source:MGI Symbol;Acc:MGI:106211]	ENSMUSG00000006699	1.50783
8430410A17Rik	RIKEN cDNA 8430410A17 gene [Source:MGI Symbol;Acc:MGI:1914053]	ENSMUSG00000030060	1.50718
Scml2	sex comb on midleg-like 2 (Drosophila) [Source:MGI Symbol;Acc:MGI:1340042]	ENSMUSG00000000037	1.50616
Cds1	CDP-diacylglycerol synthase 1 [Source:MGI Symbol;Acc:MGI:1921846]	ENSMUSG00000029330	1.5061
Slc30a9	solute carrier family 30 (zinc transporter), member 9 [Source:MGI Symbol;Acc:MGI:1923690]	ENSMUSG00000029221	1.50582
Cd68	CD68 antigen [Source:MGI Symbol;Acc:MGI:88342]	ENSMUSG00000018774	1.50553
Ahdc1	AT hook, DNA binding motif, containing 1 [Source:MGI Symbol;Acc:MGI:2444218]	ENSMUSG00000037692	1.50537
Fos	FBJ osteosarcoma oncogene [Source:MGI Symbol;Acc:MGI:95574]	ENSMUSG00000021250	1.50529
Nlrp6	NLR family, pyrin domain containing 6 [Source:MGI Symbol;Acc:MGI:2141990]	ENSMUSG00000038745	1.50515
Speer4d, Speer4c, Gm17019, 4930572O03Rik, Gm10354	spermatogenesis associated glutamate (E)-rich protein 4d [Source:MGI Symbol;Acc:MGI:2668869] /// spermatogenesis associated glutamate (E)-rich protein 4c [Source:MGI Symbol;Acc:MGI:1914023] /// predicted gene 17019 [Source:MGI Symbol;Acc:MGI:4868370] /// RIKEN cDNA 4930572O03 gene [Source:MGI Symbol;Acc:MGI:2441686] /// predicted gene 10354 [Source:MGI Symbol;Acc:MGI:3809109]	ENSMUSG00000070933, ENSMUSG00000073208, ENSMUSG00000091897, ENSMUSG00000069720, ENSMUSG00000072188	1.50509
Ccdc19	coiled-coil domain containing 19 [Source:MGI Symbol;Acc:MGI:1919120]	ENSMUSG00000026546	1.50441
Cyp2b13	cytochrome P450, family 2, subfamily b, polypeptide 13 [Source:MGI Symbol;Acc:MGI:88599]	ENSMUSG00000040583	1.50392
Socs2	suppressor of cytokine signaling 2 [Source:MGI Symbol;Acc:MGI:1201787]	ENSMUSG00000020027	1.5039
Ica1	islet cell autoantigen 1 [Source:MGI Symbol;Acc:MGI:96391]	ENSMUSG00000062995	1.50361
Cyp2c44	cytochrome P450, family 2, subfamily c, polypeptide 44 [Source:MGI Symbol;Acc:MGI:1888897]	ENSMUSG00000025197	1.50357
Sfrp1	secreted frizzled-related protein 1 [Source:MGI Symbol;Acc:MGI:892014]	ENSMUSG00000031548	1.50347
Capn3	calpain 3 [Source:MGI Symbol;Acc:MGI:107437]	ENSMUSG00000079110	1.50346
Rnf135	ring finger protein 135 [Source:MGI Symbol;Acc:MGI:1919206]	ENSMUSG00000020707	1.50311
Fam186b	family with sequence similarity 186, member B [Source:MGI Symbol;Acc:MGI:3647604]	ENSMUSG00000078907	1.50254
Eif4a2	eukaryotic translation initiation factor 4A2 [Source:MGI Symbol;Acc:MGI:106906]	ENSMUSG00000022884	1.50232
Gm11545 (pseudogene)	predicted gene 11545 [Source:MGI Symbol;Acc:MGI:2144683]	ENSMUSG00000075611	1.50206
Srgap2	SLIT-ROBO Rho GTPase activating protein 2 [Source:MGI Symbol;Acc:MGI:109605]	ENSMUSG00000026425	1.50122
Gnptg, Unkl	N-acetylglucosamine-1-phosphotransferase, gamma subunit [Source:MGI Symbol;Acc:MGI:2147006] /// unkempt-like (Drosophila) [Source:MGI Symbol;Acc:MGI:1921404]	ENSMUSG00000035521, ENSMUSG00000015127	0.666292
Csf1	colony stimulating factor 1 (macrophage) [Source:MGI Symbol;Acc:MGI:1339753]	ENSMUSG00000014599	0.666138
Ube2b	ubiquitin-conjugating enzyme E2B, RAD6 homology (S. cerevisiae) [Source:MGI Symbol;Acc:MGI:102944]	ENSMUSG00000020390	0.666083
Xlr4c	X-linked lymphocyte-regulated 4C [Source:MGI Symbol;Acc:MGI:3574099]	ENSMUSG00000031362	0.66559
Mt1	metallothionein 1 [Source:MGI Symbol;Acc:MGI:97171]	ENSMUSG00000031765	0.665229
Ext1	exostoses (multiple) 1 [Source:MGI Symbol;Acc:MGI:894663]	ENSMUSG00000061731	0.665174
Klhl22	kelch-like 22 (Drosophila) [Source:MGI Symbol;Acc:MGI:1337995]	ENSMUSG00000022750	0.665
Mapre2	microtubule-associated protein, RP/EB family, member 2 [Source:MGI Symbol;Acc:MGI:106271]	ENSMUSG00000024277	0.664762
Papd7	PAP associated domain containing 7 [Source:MGI Symbol;Acc:MGI:2682295]	ENSMUSG00000034575	0.664745
Tmem165	transmembrane protein 165 [Source:MGI Symbol;Acc:MGI:894407]	ENSMUSG00000029234	0.664727
Msx2	homeobox, msh-like 2 [Source:MGI Symbol;Acc:MGI:97169]	ENSMUSG00000021469	0.664696
Cenpl	centromere protein L [Source:MGI Symbol;Acc:MGI:1917704]	ENSMUSG00000026708	0.664373
D17H6S56E-5	DNA segment, Chr 17, human D6S56E 5 [Source:MGI Symbol;Acc:MGI:1306799]	ENSMUSG00000091747	0.663829
Stbd1	starch binding domain 1 [Source:MGI Symbol;Acc:MGI:1261768]	ENSMUSG00000047963	0.663769
Pon2	paraoxonase 2 [Source:MGI Symbol;Acc:MGI:106687]	ENSMUSG00000032667	0.663573
Gm13480 (lincRNA)	predicted gene 13480 [Source:MGI Symbol;Acc:MGI:3651871]	ENSMUSG00000085357	0.663232
Msx2	homeobox, msh-like 2 [Source:MGI Symbol;Acc:MGI:97169]	ENSMUSG00000021469	0.663151
Atxn7l3	ataxin 7-like 3 [Source:MGI Symbol;Acc:MGI:3036270]	ENSMUSG00000059995	0.663024
Zfp28	zinc finger protein 28 [Source:MGI Symbol;Acc:MGI:99175]	ENSMUSG00000062861	0.662923
Psat1	phosphoserine aminotransferase 1 [Source:MGI Symbol;Acc:MGI:2183441]	ENSMUSG00000024640	0.662429
Anxa8	annexin A8 [Source:MGI Symbol;Acc:MGI:1201374]	ENSMUSG00000021950	0.66216
Lrrc51	leucine rich repeat containing 51 [Source:MGI Symbol;Acc:MGI:1916608]	ENSMUSG00000064307	0.661925
G2e3	G2/M-phase specific E3 ubiquitin ligase [Source:MGI Symbol;Acc:MGI:2444298]	ENSMUSG00000035293	0.661794
Msx2	homeobox, msh-like 2 [Source:MGI Symbol;Acc:MGI:97169]	ENSMUSG00000021469	0.661458
G2e3	G2/M-phase specific E3 ubiquitin ligase [Source:MGI Symbol;Acc:MGI:2444298]	ENSMUSG00000035293	0.661338
Zkscan4	zinc finger with KRAB and SCAN domains 4 [Source:MGI Symbol;Acc:MGI:3649412]	ENSMUSG00000054931	0.661176
Rnf170	ring finger protein 170 [Source:MGI Symbol;Acc:MGI:1924983]	ENSMUSG00000013878	0.660897
Tlr2	toll-like receptor 2 [Source:MGI Symbol;Acc:MGI:1346060]	ENSMUSG00000027995	0.660701
Ptpn1	protein tyrosine phosphatase, non-receptor type 1 [Source:MGI Symbol;Acc:MGI:97805]	ENSMUSG00000027540	0.660533
Bub3	budding uninhibited by benzimidazoles 3 homolog (S. cerevisiae) [Source:MGI Symbol;Acc:MGI:1343463]	ENSMUSG00000066979	0.660423
Smo	smoothened homolog (Drosophila) [Source:MGI Symbol;Acc:MGI:108075]	ENSMUSG00000001761	0.659722
Sntb2	syntrophin, basic 2 [Source:MGI Symbol;Acc:MGI:101771]	ENSMUSG00000041308	0.659393
Mob4	MOB family member 4, phocein [Source:MGI Symbol;Acc:MGI:104899]	ENSMUSG00000025979	0.659174
Gm9932	predicted gene 9932 [Source:MGI Symbol;Acc:MGI:3642594]	ENSMUSG00000054032	0.659112
Sephs2	selenophosphate synthetase 2 [Source:MGI Symbol;Acc:MGI:108388]	ENSMUSG00000049091	0.65857
Mt1	metallothionein 1 [Source:MGI Symbol;Acc:MGI:97171]	ENSMUSG00000031765	0.658499
Faim2	Fas apoptotic inhibitory molecule 2 [Source:MGI Symbol;Acc:MGI:1919643]	ENSMUSG00000023011	0.658177
Chmp4b	charged multivesicular body protein 4B [Source:MGI Symbol;Acc:MGI:1922858]	ENSMUSG00000038467	0.658088
Anxa8	annexin A8 [Source:MGI Symbol;Acc:MGI:1201374]	ENSMUSG00000021950	0.657188
Pax7	paired box gene 7 [Source:MGI Symbol;Acc:MGI:97491]	ENSMUSG00000028736	0.657035
Mttp	microsomal triglyceride transfer protein [Source:MGI Symbol;Acc:MGI:106926]	ENSMUSG00000028158	0.656397
Cdca2	cell division cycle associated 2 [Source:MGI Symbol;Acc:MGI:1919787]	ENSMUSG00000048922	0.656166
Tubb4b	tubulin, beta 4B class IVB [Source:MGI Symbol;Acc:MGI:1915472]	ENSMUSG00000036752	0.655843
Slc22a5	solute carrier family 22 (organic cation transporter), member 5 [Source:MGI Symbol;Acc:MGI:1329012]	ENSMUSG00000018900	0.655406
Lef1	lymphoid enhancer binding factor 1 [Source:MGI Symbol;Acc:MGI:96770]	ENSMUSG00000027985	0.655332
Tlr2	toll-like receptor 2 [Source:MGI Symbol;Acc:MGI:1346060]	ENSMUSG00000027995	0.654944
Tmem54	transmembrane protein 54 [Source:MGI Symbol;Acc:MGI:1913510]	ENSMUSG00000028786	0.654103
Srxn1	sulfiredoxin 1 homolog (S. cerevisiae) [Source:MGI Symbol;Acc:MGI:104971]	ENSMUSG00000032802	0.653857
Trnt1, Crbn	tRNA nucleotidyl transferase, CCA-adding, 1 [Source:MGI Symbol;Acc:MGI:1917297] /// cereblon [Source:MGI Symbol;Acc:MGI:1913277]	ENSMUSG00000013736, ENSMUSG00000005362	0.65369
D2Ertd750e	DNA segment, Chr 2, ERATO Doi 750, expressed [Source:MGI Symbol;Acc:MGI:1289298]	ENSMUSG00000027331	0.653603
Vamp3	vesicle-associated membrane protein 3 [Source:MGI Symbol;Acc:MGI:1321389]	ENSMUSG00000028955	0.653135
Pou5f2	POU domain class 5, transcription factor 2 [Source:MGI Symbol;Acc:MGI:1922757]	ENSMUSG00000093668	0.653084
Ppapdc3	phosphatidic acid phosphatase type 2 domain containing 3 [Source:MGI Symbol;Acc:MGI:2445183]	ENSMUSG00000051373	0.653073
H1fx	H1 histone family, member X [Source:MGI Symbol;Acc:MGI:2685307]	ENSMUSG00000044927	0.65272
Nop16	NOP16 nucleolar protein homolog (yeast) [Source:MGI Symbol;Acc:MGI:107862]	ENSMUSG00000025869	0.652328
Tmem168	transmembrane protein 168 [Source:MGI Symbol;Acc:MGI:1921794]	ENSMUSG00000029569	0.652145
Asb4	ankyrin repeat and SOCS box-containing 4 [Source:MGI Symbol;Acc:MGI:1929751]	ENSMUSG00000042607	0.651622
BC048679	cDNA sequence BC048679 [Source:MGI Symbol;Acc:MGI:3510776]	ENSMUSG00000061877	0.650626
E130306D19Rik	RIKEN cDNA E130306D19 gene [Source:MGI Symbol;Acc:MGI:3036286]	ENSMUSG00000051517	0.65056
Slc1a6	solute carrier family 1 (high affinity aspartate/glutamate transporter), member 6 [Source:MGI Symbol;Acc:MGI:1096331]	ENSMUSG00000005357	0.648266
Mt2	metallothionein 2 [Source:MGI Symbol;Acc:MGI:97172]	ENSMUSG00000031762	0.64819
Ly6a	lymphocyte antigen 6 complex, locus A [Source:MGI Symbol;Acc:MGI:107527]	ENSMUSG00000075602	0.647568
Id2	inhibitor of DNA binding 2 [Source:MGI Symbol;Acc:MGI:96397]	ENSMUSG00000020644	0.64701
Arhgap19	Rho GTPase activating protein 19 [Source:MGI Symbol;Acc:MGI:1918335]	ENSMUSG00000025154	0.646751
Hist1h2ae	histone cluster 1, H2ae [Source:MGI Symbol;Acc:MGI:2448290]	ENSMUSG00000069272	0.646411
Sh2d4a	SH2 domain containing 4A [Source:MGI Symbol;Acc:MGI:1919531]	ENSMUSG00000053886	0.646079
Ubiad1	UbiA prenyltransferase domain containing 1 [Source:MGI Symbol;Acc:MGI:1918957]	ENSMUSG00000047719	0.645893
Smtn	smoothelin [Source:MGI Symbol;Acc:MGI:1354727]	ENSMUSG00000020439	0.645785
Slc24a1	solute carrier family 24 (sodium/potassium/calcium exchanger), member 1 [Source:MGI Symbol;Acc:MGI:2384871]	ENSMUSG00000034452	0.645766
Hist1h1e	histone cluster 1, H1e [Source:MGI Symbol;Acc:MGI:1931527]	ENSMUSG00000051627	0.645474
Mpst	mercaptopyruvate sulfurtransferase [Source:MGI Symbol;Acc:MGI:2179733]	ENSMUSG00000071711	0.645327
Thbs4	thrombospondin 4 [Source:MGI Symbol;Acc:MGI:1101779]	ENSMUSG00000021702	0.643946
Kcnq1	potassium voltage-gated channel, subfamily Q, member 1 [Source:MGI Symbol;Acc:MGI:108083]	ENSMUSG00000009545	0.64339
Gm5415	predicted gene 5415 [Source:MGI Symbol;Acc:MGI:3644687]	ENSMUSG00000091318	0.641811
Hes5	hairy and enhancer of split 5 (Drosophila) [Source:MGI Symbol;Acc:MGI:104876]	ENSMUSG00000048001	0.641684
Espl1	extra spindle poles-like 1 (S. cerevisiae) [Source:MGI Symbol;Acc:MGI:2146156]	ENSMUSG00000058290	0.640552
Fbxl17	F-box and leucine-rich repeat protein 17 [Source:MGI Symbol;Acc:MGI:1354704]	ENSMUSG00000023965	0.639657
Synpr	synaptoporin [Source:MGI Symbol;Acc:MGI:1919253]	ENSMUSG00000056296	0.639508
Ripply3	ripply3 homolog (zebrafish) [Source:MGI Symbol;Acc:MGI:2181192]	ENSMUSG00000022941	0.639103
C1ql1	complement component 1, q subcomponent-like 1 [Source:MGI Symbol;Acc:MGI:1344400]	ENSMUSG00000045532	0.63779
Vmn2r84	vomeronasal 2, receptor 84 [Source:MGI Symbol;Acc:MGI:3643367]	ENSMUSG00000070601	0.637552
Zfp109	zinc finger protein 109 [Source:MGI Symbol;Acc:MGI:1929099]	ENSMUSG00000074283	0.636724
Hist3h2a	histone cluster 3, H2a [Source:MGI Symbol;Acc:MGI:2448458]	ENSMUSG00000078851	0.636466
D17H6S56E-5	DNA segment, Chr 17, human D6S56E 5 [Source:MGI Symbol;Acc:MGI:1306799]	ENSMUSG00000091747	0.636179
G2e3	G2/M-phase specific E3 ubiquitin ligase [Source:MGI Symbol;Acc:MGI:2444298]	ENSMUSG00000035293	0.63608
Whsc1	Wolf-Hirschhorn syndrome candidate 1 (human) [Source:MGI Symbol;Acc:MGI:1276574]	ENSMUSG00000057406	0.635814
Srxn1	sulfiredoxin 1 homolog (S. cerevisiae) [Source:MGI Symbol;Acc:MGI:104971]	ENSMUSG00000032802	0.635812
Tlr2	toll-like receptor 2 [Source:MGI Symbol;Acc:MGI:1346060]	ENSMUSG00000027995	0.635802
Cdkn1b	cyclin-dependent kinase inhibitor 1B [Source:MGI Symbol;Acc:MGI:104565]	ENSMUSG00000003031	0.635615
Myh3	myosin, heavy polypeptide 3, skeletal muscle, embryonic [Source:MGI Symbol;Acc:MGI:1339709]	ENSMUSG00000020908	0.63559
Hist1h4i, Hist1h2ag	histone cluster 1, H4i [Source:MGI Symbol;Acc:MGI:2448432] /// histone cluster 1, H2ag [Source:MGI Symbol;Acc:MGI:2448293]	ENSMUSG00000060639, ENSMUSG00000069301	0.63457
Ntrk2	neurotrophic tyrosine kinase, receptor, type 2 [Source:MGI Symbol;Acc:MGI:97384]	ENSMUSG00000055254	0.634401
Cep78	centrosomal protein 78 [Source:MGI Symbol;Acc:MGI:1924386]	ENSMUSG00000041491	0.634013
Add1	adducin 1 (alpha) [Source:MGI Symbol;Acc:MGI:87918]	ENSMUSG00000029106	0.633596
Rpl27a, Snora3 (snoRNA)	ribosomal protein L27A [Source:MGI Symbol;Acc:MGI:1347076] /// small nucleolar RNA, H/ACA box 3 [Source:MGI Symbol;Acc:MGI:3819498]	ENSMUSG00000046364, ENSMUSG00000065016	0.633121
Akap11	A kinase (PRKA) anchor protein 11 [Source:MGI Symbol;Acc:MGI:2684060]	ENSMUSG00000022016	0.632991
Sun2	Sad1 and UNC84 domain containing 2 [Source:MGI Symbol;Acc:MGI:2443011]	ENSMUSG00000042524	0.632687
Ubl3	ubiquitin-like 3 [Source:MGI Symbol;Acc:MGI:1344373]	ENSMUSG00000001687	0.631329
Ncapd2	non-SMC condensin I complex, subunit D2 [Source:MGI Symbol;Acc:MGI:1915548]	ENSMUSG00000038252	0.631219
Tnnt3	troponin T3, skeletal, fast [Source:MGI Symbol;Acc:MGI:109550]	ENSMUSG00000061723	0.631074
Myh3	myosin, heavy polypeptide 3, skeletal muscle, embryonic [Source:MGI Symbol;Acc:MGI:1339709]	ENSMUSG00000020908	0.630989
Gpx8	glutathione peroxidase 8 (putative) [Source:MGI Symbol;Acc:MGI:1916840]	ENSMUSG00000021760	0.630702
Tlr2	toll-like receptor 2 [Source:MGI Symbol;Acc:MGI:1346060]	ENSMUSG00000027995	0.630015
Tmem184b	transmembrane protein 184b [Source:MGI Symbol;Acc:MGI:2445179]	ENSMUSG00000009035	0.629706
Psmb8	proteasome (prosome, macropain) subunit, beta type 8 (large multifunctional peptidase 7) [Source:MGI Symbol;Acc:MGI:1346527]	ENSMUSG00000024338	0.629296
Myh7	myosin, heavy polypeptide 7, cardiac muscle, beta [Source:MGI Symbol;Acc:MGI:2155600]	ENSMUSG00000053093	0.628041
Fads3	fatty acid desaturase 3 [Source:MGI Symbol;Acc:MGI:1928740]	ENSMUSG00000024664	0.627395
Zcchc12	zinc finger, CCHC domain containing 12 [Source:MGI Symbol;Acc:MGI:1919943]	ENSMUSG00000036699	0.627017
Rpgrip1, Supt16h	retinitis pigmentosa GTPase regulator interacting protein 1 [Source:MGI Symbol;Acc:MGI:1932134] /// suppressor of Ty 16 homolog (S. cerevisiae) [Source:MGI Symbol;Acc:MGI:1890948]	ENSMUSG00000057132, ENSMUSG00000035726	0.62663
Sept2	septin 2 [Source:MGI Symbol;Acc:MGI:97298]	ENSMUSG00000026276	0.625851
Sfxn2	sideroflexin 2 [Source:MGI Symbol;Acc:MGI:2137678]	ENSMUSG00000025036	0.625599
Hnrnpa2b1	heterogeneous nuclear ribonucleoprotein A2/B1 [Source:MGI Symbol;Acc:MGI:104819]	ENSMUSG00000004980	0.625313
Ntrk2	neurotrophic tyrosine kinase, receptor, type 2 [Source:MGI Symbol;Acc:MGI:97384]	ENSMUSG00000055254	0.625086
Mtss1	metastasis suppressor 1 [Source:MGI Symbol;Acc:MGI:2384818]	ENSMUSG00000022353	0.624883
Cdc23, Kif20a	CDC23 (cell division cycle 23, yeast, homolog) [Source:MGI Symbol;Acc:MGI:1098815] /// kinesin family member 20A [Source:MGI Symbol;Acc:MGI:1201682]	ENSMUSG00000024370, ENSMUSG00000003779	0.62441
4930547N16Rik	RIKEN cDNA 4930547N16 gene [Source:MGI Symbol;Acc:MGI:1922567]	ENSMUSG00000035365	0.624122
Fam72a	family with sequence similarity 72, member A [Source:MGI Symbol;Acc:MGI:1919669]	ENSMUSG00000055184	0.623733
Cenpe	centromere protein E [Source:MGI Symbol;Acc:MGI:1098230]	ENSMUSG00000045328	0.623725
2810055F11Rik	RIKEN cDNA 2810055F11 gene [Source:MGI Symbol;Acc:MGI:1914467]	ENSMUSG00000019718	0.623717
Nat8l	N-acetyltransferase 8-like [Source:MGI Symbol;Acc:MGI:2447776]	ENSMUSG00000048142	0.623627
Msx2	homeobox, msh-like 2 [Source:MGI Symbol;Acc:MGI:97169]	ENSMUSG00000021469	0.623536
Pgam1, Pgam1-ps2 (pseudogene)	phosphoglycerate mutase 1 [Source:MGI Symbol;Acc:MGI:97552] /// phosphoglycerate mutase 1, pseudogene 2 [Source:MGI Symbol;Acc:MGI:3645709]	ENSMUSG00000011752, ENSMUSG00000082016	0.623533
Tnnt3	troponin T3, skeletal, fast [Source:MGI Symbol;Acc:MGI:109550]	ENSMUSG00000061723	0.622628
Mapk8	mitogen-activated protein kinase 8 [Source:MGI Symbol;Acc:MGI:1346861]	ENSMUSG00000021936	0.622442
Armc2	armadillo repeat containing 2 [Source:MGI Symbol;Acc:MGI:1916449]	ENSMUSG00000071324	0.621562
Cenpe	centromere protein E [Source:MGI Symbol;Acc:MGI:1098230]	ENSMUSG00000045328	0.6211
Trim65	tripartite motif-containing 65 [Source:MGI Symbol;Acc:MGI:2442815]	ENSMUSG00000054517	0.620676
Depdc1b	DEP domain containing 1B [Source:MGI Symbol;Acc:MGI:2145425]	ENSMUSG00000021697	0.620531
Nostrin	nitric oxide synthase trafficker [Source:MGI Symbol;Acc:MGI:3606242]	ENSMUSG00000034738	0.62031
Ntrk2	neurotrophic tyrosine kinase, receptor, type 2 [Source:MGI Symbol;Acc:MGI:97384]	ENSMUSG00000055254	0.620001
4930415O20Rik	RIKEN cDNA 4930415O20 gene [Source:MGI Symbol;Acc:MGI:1921113]	ENSMUSG00000022993	0.619361
Zscan5b	zinc finger and SCAN domain containing 5B [Source:MGI Symbol;Acc:MGI:2159640]	ENSMUSG00000058028	0.619036
Srp14	signal recognition particle 14 [Source:MGI Symbol;Acc:MGI:107169]	ENSMUSG00000009549	0.618121
Arhgap19	Rho GTPase activating protein 19 [Source:MGI Symbol;Acc:MGI:1918335]	ENSMUSG00000025154	0.618042
Slamf9	SLAM family member 9 [Source:MGI Symbol;Acc:MGI:1923692]	ENSMUSG00000026548	0.616992
Pttg1	pituitary tumor-transforming gene 1 [Source:MGI Symbol;Acc:MGI:1353578]	ENSMUSG00000020415	0.61641
Hmmr	hyaluronan mediated motility receptor (RHAMM) [Source:MGI Symbol;Acc:MGI:104667]	ENSMUSG00000020330	0.616281
Id2	inhibitor of DNA binding 2 [Source:MGI Symbol;Acc:MGI:96397]	ENSMUSG00000020644	0.615572
Ankib1	ankyrin repeat and IBR domain containing 1 [Source:MGI Symbol;Acc:MGI:1918047]	ENSMUSG00000040351	0.615042
Tlr2	toll-like receptor 2 [Source:MGI Symbol;Acc:MGI:1346060]	ENSMUSG00000027995	0.614076
Hyls1	hydrolethalus syndrome 1 [Source:MGI Symbol;Acc:MGI:1924082]	ENSMUSG00000050555	0.611105
Acsl5	acyl-CoA synthetase long-chain family member 5 [Source:MGI Symbol;Acc:MGI:1919129]	ENSMUSG00000024981	0.61041
Chek2	checkpoint kinase 2 [Source:MGI Symbol;Acc:MGI:1355321]	ENSMUSG00000029521	0.6099
Armcx1	armadillo repeat containing, X-linked 1 [Source:MGI Symbol;Acc:MGI:1925498]	ENSMUSG00000033460	0.608944
Nup98	nucleoporin 98 [Source:MGI Symbol;Acc:MGI:109404]	ENSMUSG00000063550	0.608525
Prc1	protein regulator of cytokinesis 1 [Source:MGI Symbol;Acc:MGI:1858961]	ENSMUSG00000038943	0.608034
Cwc15	CWC15 homolog (S. cerevisiae) [Source:MGI Symbol;Acc:MGI:1913320]	ENSMUSG00000004096	0.607736
Hapln4	hyaluronan and proteoglycan link protein 4 [Source:MGI Symbol;Acc:MGI:2679531]	ENSMUSG00000007594	0.607437
Pcif1	PDX1 C-terminal inhibiting factor 1 [Source:MGI Symbol;Acc:MGI:2443858]	ENSMUSG00000039849	0.606869
Tlr2	toll-like receptor 2 [Source:MGI Symbol;Acc:MGI:1346060]	ENSMUSG00000027995	0.606589
Gm12463 (pseudogene), Aurkc	predicted gene 12463 [Source:MGI Symbol;Acc:MGI:3650648] /// aurora kinase C [Source:MGI Symbol;Acc:MGI:1321119]	ENSMUSG00000080916, ENSMUSG00000070837	0.60554
Psap	prosaposin [Source:MGI Symbol;Acc:MGI:97783]	ENSMUSG00000004207	0.605203
Srcin1	SRC kinase signaling inhibitor 1 [Source:MGI Symbol;Acc:MGI:1933179]	ENSMUSG00000038453	0.604841
Hist1h1c	histone cluster 1, H1c [Source:MGI Symbol;Acc:MGI:1931526]	ENSMUSG00000036181	0.604484
Myh6, Myh7	myosin, heavy polypeptide 6, cardiac muscle, alpha [Source:MGI Symbol;Acc:MGI:97255] /// myosin, heavy polypeptide 7, cardiac muscle, beta [Source:MGI Symbol;Acc:MGI:2155600]	ENSMUSG00000040752, ENSMUSG00000053093	0.604108
Olfr693	olfactory receptor 693 [Source:MGI Symbol;Acc:MGI:3030527]	ENSMUSG00000051680	0.604099
Pnrc2	proline-rich nuclear receptor coactivator 2 [Source:MGI Symbol;Acc:MGI:106512]	ENSMUSG00000028675	0.604088
G2e3	G2/M-phase specific E3 ubiquitin ligase [Source:MGI Symbol;Acc:MGI:2444298]	ENSMUSG00000035293	0.603789
Tlr2	toll-like receptor 2 [Source:MGI Symbol;Acc:MGI:1346060]	ENSMUSG00000027995	0.603688
2010317E24Rik	RIKEN cDNA 2010317E24 gene [Source:MGI Symbol;Acc:MGI:1919330]	ENSMUSG00000026955	0.602908
Arhgap19	Rho GTPase activating protein 19 [Source:MGI Symbol;Acc:MGI:1918335]	ENSMUSG00000025154	0.601549
Lmo7	LIM domain only 7 [Source:MGI Symbol;Acc:MGI:1353586]	ENSMUSG00000033060	0.600746
Myh6	myosin, heavy polypeptide 6, cardiac muscle, alpha [Source:MGI Symbol;Acc:MGI:97255]	ENSMUSG00000040752	0.600257
Gata2	GATA binding protein 2 [Source:MGI Symbol;Acc:MGI:95662]	ENSMUSG00000015053	0.599809
Ckap2l	cytoskeleton associated protein 2-like [Source:MGI Symbol;Acc:MGI:1917716]	ENSMUSG00000048327	0.599693
Spag5	sperm associated antigen 5 [Source:MGI Symbol;Acc:MGI:1927470]	ENSMUSG00000002055	0.599561
Ppp2ca	protein phosphatase 2 (formerly 2A), catalytic subunit, alpha isoform [Source:MGI Symbol;Acc:MGI:1321159]	ENSMUSG00000020349	0.599459
1700018B08Rik	RIKEN cDNA 1700018B08 gene [Source:MGI Symbol;Acc:MGI:1923655]	ENSMUSG00000031809	0.598183
Daam1	dishevelled associated activator of morphogenesis 1 [Source:MGI Symbol;Acc:MGI:1914596]	ENSMUSG00000034574	0.597938
Nol3	nucleolar protein 3 (apoptosis repressor with CARD domain) [Source:MGI Symbol;Acc:MGI:1925938]	ENSMUSG00000014776	0.597588
AC163666.1 (snoRNA)	--	ENSMUSG00000095772	0.597555
Rlbp1	retinaldehyde binding protein 1 [Source:MGI Symbol;Acc:MGI:97930]	ENSMUSG00000039194	0.597259
Rab33b	RAB33B, member of RAS oncogene family [Source:MGI Symbol;Acc:MGI:1330805]	ENSMUSG00000027739	0.596128
Troap	trophinin associated protein [Source:MGI Symbol;Acc:MGI:1925983]	ENSMUSG00000032783	0.595559
Ormdl1	ORM1-like 1 (S. cerevisiae) [Source:MGI Symbol;Acc:MGI:2181669]	ENSMUSG00000026097	0.595271
Grn	granulin [Source:MGI Symbol;Acc:MGI:95832]	ENSMUSG00000034708	0.594848
Cenpe	centromere protein E [Source:MGI Symbol;Acc:MGI:1098230]	ENSMUSG00000045328	0.593973
Cacna1a	calcium channel, voltage-dependent, P/Q type, alpha 1A subunit [Source:MGI Symbol;Acc:MGI:109482]	ENSMUSG00000034656	0.593683
Rap1b	RAS related protein 1b [Source:MGI Symbol;Acc:MGI:894315]	ENSMUSG00000052681	0.591855
Incenp	inner centromere protein [Source:MGI Symbol;Acc:MGI:1313288]	ENSMUSG00000024660	0.591385
Mrpl15	mitochondrial ribosomal protein L15 [Source:MGI Symbol;Acc:MGI:1351639]	ENSMUSG00000033845	0.590918
Exoc3	exocyst complex component 3 [Source:MGI Symbol;Acc:MGI:2443972]	ENSMUSG00000034152	0.590238
Neurl1b	neuralized homolog 1b (Drosophila) [Source:MGI Symbol;Acc:MGI:3643092]	ENSMUSG00000034413	0.590028
Ddit4	DNA-damage-inducible transcript 4 [Source:MGI Symbol;Acc:MGI:1921997]	ENSMUSG00000020108	0.589396
2900011O08Rik	RIKEN cDNA 2900011O08 gene [Source:MGI Symbol;Acc:MGI:1914504]	ENSMUSG00000044117	0.588856
Atp8a2	ATPase, aminophospholipid transporter-like, class I, type 8A, member 2 [Source:MGI Symbol;Acc:MGI:1354710]	ENSMUSG00000021983	0.587647
Timp2	tissue inhibitor of metalloproteinase 2 [Source:MGI Symbol;Acc:MGI:98753]	ENSMUSG00000017466	0.586811
3830417A13Rik	RIKEN cDNA 3830417A13 gene [Source:MGI Symbol;Acc:MGI:1917946]	ENSMUSG00000031179	0.586711
Gata3	GATA binding protein 3 [Source:MGI Symbol;Acc:MGI:95663]	ENSMUSG00000015619	0.583766
Cdkn1c	cyclin-dependent kinase inhibitor 1C (P57) [Source:MGI Symbol;Acc:MGI:104564]	ENSMUSG00000037664	0.582317
Mutyh	mutY homolog (E. coli) [Source:MGI Symbol;Acc:MGI:1917853]	ENSMUSG00000028687	0.580369
Car2	carbonic anhydrase 2 [Source:MGI Symbol;Acc:MGI:88269]	ENSMUSG00000027562	0.580186
Gnat2	guanine nucleotide binding protein, alpha transducing 2 [Source:MGI Symbol;Acc:MGI:95779]	ENSMUSG00000009108	0.579781
Cdc23, Kif20a	CDC23 (cell division cycle 23, yeast, homolog) [Source:MGI Symbol;Acc:MGI:1098815] /// kinesin family member 20A [Source:MGI Symbol;Acc:MGI:1201682]	ENSMUSG00000024370, ENSMUSG00000003779	0.579649
Tacc3	transforming, acidic coiled-coil containing protein 3 [Source:MGI Symbol;Acc:MGI:1341163]	ENSMUSG00000037313	0.578269
Gm12856 (pseudogene)	predicted gene 12856 [Source:MGI Symbol;Acc:MGI:3649664]	ENSMUSG00000084133	0.577382
Reep4	receptor accessory protein 4 [Source:MGI Symbol;Acc:MGI:1919799]	ENSMUSG00000033589	0.577373
She	src homology 2 domain-containing transforming protein E [Source:MGI Symbol;Acc:MGI:1099462]	ENSMUSG00000046280	0.575278
Gata2	GATA binding protein 2 [Source:MGI Symbol;Acc:MGI:95662]	ENSMUSG00000015053	0.575097
Fam110a	family with sequence similarity 110, member A [Source:MGI Symbol;Acc:MGI:1921097]	ENSMUSG00000027459	0.574556
H1f0	H1 histone family, member 0 [Source:MGI Symbol;Acc:MGI:95893]	ENSMUSG00000096210	0.57365
H2afx	H2A histone family, member X [Source:MGI Symbol;Acc:MGI:102688]	ENSMUSG00000049932	0.573371
Depdc1a	DEP domain containing 1a [Source:MGI Symbol;Acc:MGI:1923381]	ENSMUSG00000028175	0.573302
Ly6c2	lymphocyte antigen 6 complex, locus C2 [Source:MGI Symbol;Acc:MGI:3712069]	ENSMUSG00000022584	0.571893
Suds3	suppressor of defective silencing 3 homolog (S. cerevisiae) [Source:MGI Symbol;Acc:MGI:1919204]	ENSMUSG00000066900	0.571524
Cdc20	cell division cycle 20 homolog (S. cerevisiae) [Source:MGI Symbol;Acc:MGI:1859866]	ENSMUSG00000006398	0.569737
Aurkb	aurora kinase B [Source:MGI Symbol;Acc:MGI:107168]	ENSMUSG00000020897	0.567199
Aspm	asp (abnormal spindle)-like, microcephaly associated (Drosophila) [Source:MGI Symbol;Acc:MGI:1334448]	ENSMUSG00000033952	0.567079
Cyp2d26	cytochrome P450, family 2, subfamily d, polypeptide 26 [Source:MGI Symbol;Acc:MGI:1923529]	ENSMUSG00000022445	0.566556
Kif4	kinesin family member 4 [Source:MGI Symbol;Acc:MGI:108389]	ENSMUSG00000034311	0.564313
H1f0	H1 histone family, member 0 [Source:MGI Symbol;Acc:MGI:95893]	ENSMUSG00000096210	0.562279
Hmmr	hyaluronan mediated motility receptor (RHAMM) [Source:MGI Symbol;Acc:MGI:104667]	ENSMUSG00000020330	0.561429
Ccna1	cyclin A1 [Source:MGI Symbol;Acc:MGI:108042]	ENSMUSG00000027793	0.5598
Top2a	topoisomerase (DNA) II alpha [Source:MGI Symbol;Acc:MGI:98790]	ENSMUSG00000020914	0.558931
Gpx7	glutathione peroxidase 7 [Source:MGI Symbol;Acc:MGI:1914555]	ENSMUSG00000028597	0.557083
Hist1h2bc	histone cluster 1, H2bc [Source:MGI Symbol;Acc:MGI:1915274]	ENSMUSG00000018102	0.556778
Cnpy1	canopy 1 homolog (zebrafish) [Source:MGI Symbol;Acc:MGI:2442451]	ENSMUSG00000044681	0.556484
Cenpf	centromere protein F [Source:MGI Symbol;Acc:MGI:1313302]	ENSMUSG00000026605	0.555901
Socs5	suppressor of cytokine signaling 5 [Source:MGI Symbol;Acc:MGI:2385459]	ENSMUSG00000037104	0.554229
Cdc25c	cell division cycle 25 homolog C (S. pombe) [Source:MGI Symbol;Acc:MGI:88350]	ENSMUSG00000044201	0.552669
Piwil4	piwi-like homolog 4 (Drosophila) [Source:MGI Symbol;Acc:MGI:3041167]	ENSMUSG00000036912	0.551959
Clvs2	clavesin 2 [Source:MGI Symbol;Acc:MGI:2443223]	ENSMUSG00000019785	0.551135
Aurka	aurora kinase A [Source:MGI Symbol;Acc:MGI:894678]	ENSMUSG00000027496	0.548513
Cdk1	cyclin-dependent kinase 1 [Source:MGI Symbol;Acc:MGI:88351]	ENSMUSG00000019942	0.547971
Fgfr2, Ctbp2	fibroblast growth factor receptor 2 [Source:MGI Symbol;Acc:MGI:95523] /// C-terminal binding protein 2 [Source:MGI Symbol;Acc:MGI:1201686]	ENSMUSG00000030849, ENSMUSG00000030970	0.545735
Epcam	epithelial cell adhesion molecule [Source:MGI Symbol;Acc:MGI:106653]	ENSMUSG00000045394	0.544434
E130306D19Rik	RIKEN cDNA E130306D19 gene [Source:MGI Symbol;Acc:MGI:3036286]	ENSMUSG00000051517	0.544166
3830417A13Rik	RIKEN cDNA 3830417A13 gene [Source:MGI Symbol;Acc:MGI:1917946]	ENSMUSG00000031179	0.542391
Cdk17	cyclin-dependent kinase 17 [Source:MGI Symbol;Acc:MGI:97517]	ENSMUSG00000020015	0.542286
Prr11	proline rich 11 [Source:MGI Symbol;Acc:MGI:2444496]	ENSMUSG00000020493	0.540686
Syt10	synaptotagmin X [Source:MGI Symbol;Acc:MGI:1859546]	ENSMUSG00000063260	0.539956
Tex101	testis expressed gene 101 [Source:MGI Symbol;Acc:MGI:1930791]	ENSMUSG00000062773	0.538796
Ralgps1	Ral GEF with PH domain and SH3 binding motif 1 [Source:MGI Symbol;Acc:MGI:1922008]	ENSMUSG00000038831	0.538784
Tnfaip8l1	tumor necrosis factor, alpha-induced protein 8-like 1 [Source:MGI Symbol;Acc:MGI:1913693]	ENSMUSG00000044469	0.538135
Cct4	chaperonin containing Tcp1, subunit 4 (delta) [Source:MGI Symbol;Acc:MGI:104689]	ENSMUSG00000007739	0.537586
Cd9	CD9 antigen [Source:MGI Symbol;Acc:MGI:88348]	ENSMUSG00000030342	0.537005
Kpna2, Gm10259, Gm10184	karyopherin (importin) alpha 2 [Source:MGI Symbol;Acc:MGI:103561] /// predicted pseudogene 10259 [Source:MGI Symbol;Acc:MGI:3704211] /// predicted pseudogene 10184 [Source:MGI Symbol;Acc:MGI:3704480]	ENSMUSG00000018362, ENSMUSG00000069083, ENSMUSG00000066878	0.536155
Fut10	fucosyltransferase 10 [Source:MGI Symbol;Acc:MGI:2384748]	ENSMUSG00000046152	0.534827
Lage3	L antigen family, member 3 [Source:MGI Symbol;Acc:MGI:1913442]	ENSMUSG00000015289	0.534131
Gas2l3	growth arrest-specific 2 like 3 [Source:MGI Symbol;Acc:MGI:1918780]	ENSMUSG00000074802	0.533712
Gpx3	glutathione peroxidase 3 [Source:MGI Symbol;Acc:MGI:105102]	ENSMUSG00000018339	0.529202
Fgfr2, Ctbp2	fibroblast growth factor receptor 2 [Source:MGI Symbol;Acc:MGI:95523] /// C-terminal binding protein 2 [Source:MGI Symbol;Acc:MGI:1201686]	ENSMUSG00000030849, ENSMUSG00000030970	0.527662
Gm10259, Kpna2, Gm10184	predicted pseudogene 10259 [Source:MGI Symbol;Acc:MGI:3704211] /// karyopherin (importin) alpha 2 [Source:MGI Symbol;Acc:MGI:103561] /// predicted pseudogene 10184 [Source:MGI Symbol;Acc:MGI:3704480]	ENSMUSG00000069083, ENSMUSG00000018362, ENSMUSG00000066878	0.526237
Ccnb1	cyclin B1 [Source:MGI Symbol;Acc:MGI:88302]	ENSMUSG00000041431	0.524579
Ifi27l2a	interferon, alpha-inducible protein 27 like 2A [Source:MGI Symbol;Acc:MGI:1924183]	ENSMUSG00000079017	0.523153
Lmnb1	lamin B1 [Source:MGI Symbol;Acc:MGI:96795]	ENSMUSG00000024590	0.5221
Ppp3r1, Wdr92	protein phosphatase 3, regulatory subunit B, alpha isoform (calcineurin B, type I) [Source:MGI Symbol;Acc:MGI:107172] /// WD repeat domain 92 [Source:MGI Symbol;Acc:MGI:2144224]	ENSMUSG00000033953, ENSMUSG00000078970	0.516551
Rasip1	Ras interacting protein 1 [Source:MGI Symbol;Acc:MGI:1917153]	ENSMUSG00000044562	0.51183
Ccnb1	cyclin B1 [Source:MGI Symbol;Acc:MGI:88302]	ENSMUSG00000041431	0.511708
Ank	progressive ankylosis [Source:MGI Symbol;Acc:MGI:3045421]	ENSMUSG00000022265	0.507846
Fam83d	family with sequence similarity 83, member D [Source:MGI Symbol;Acc:MGI:1919128]	ENSMUSG00000027654	0.500626
Fam64a	family with sequence similarity 64, member A [Source:MGI Symbol;Acc:MGI:1924434]	ENSMUSG00000020808	0.494539
Gas2l3	growth arrest-specific 2 like 3 [Source:MGI Symbol;Acc:MGI:1918780]	ENSMUSG00000074802	0.492773
Gm9	predicted gene 9 [Source:MGI Symbol;Acc:MGI:2684855]	ENSMUSG00000073243	0.490839
Tuba1c	tubulin, alpha 1C [Source:MGI Symbol;Acc:MGI:1095409]	ENSMUSG00000043091	0.487674
Ccnf	cyclin F [Source:MGI Symbol;Acc:MGI:102551]	ENSMUSG00000072082	0.479984
Cdc25c	cell division cycle 25 homolog C (S. pombe) [Source:MGI Symbol;Acc:MGI:88350]	ENSMUSG00000044201	0.476155
Cdkn3	cyclin-dependent kinase inhibitor 3 [Source:MGI Symbol;Acc:MGI:1919641]	ENSMUSG00000037628	0.473197
Cenpf	centromere protein F [Source:MGI Symbol;Acc:MGI:1313302]	ENSMUSG00000026605	0.468141
Msc	musculin [Source:MGI Symbol;Acc:MGI:1333884]	ENSMUSG00000025930	0.465225
Plk1	polo-like kinase 1 (Drosophila) [Source:MGI Symbol;Acc:MGI:97621]	ENSMUSG00000030867	0.464727
Arl6ip1	ADP-ribosylation factor-like 6 interacting protein 1 [Source:MGI Symbol;Acc:MGI:1858943]	ENSMUSG00000030654	0.448429
Chmp4b	charged multivesicular body protein 4B [Source:MGI Symbol;Acc:MGI:1922858]	ENSMUSG00000038467	0.448294
Ube2c	ubiquitin-conjugating enzyme E2C [Source:MGI Symbol;Acc:MGI:1915862]	ENSMUSG00000001403	0.447519
Hccs	holocytochrome c synthetase [Source:MGI Symbol;Acc:MGI:106911]	ENSMUSG00000031352	0.443756
Cdkn3	cyclin-dependent kinase inhibitor 3 [Source:MGI Symbol;Acc:MGI:1919641]	ENSMUSG00000037628	0.434652
Nusap1	nucleolar and spindle associated protein 1 [Source:MGI Symbol;Acc:MGI:2675669]	ENSMUSG00000027306	0.42813
Mki67	antigen identified by monoclonal antibody Ki 67 [Source:MGI Symbol;Acc:MGI:106035]	ENSMUSG00000031004	0.421263
Emp1	epithelial membrane protein 1 [Source:MGI Symbol;Acc:MGI:107941]	ENSMUSG00000030208	0.41982
Mki67	antigen identified by monoclonal antibody Ki 67 [Source:MGI Symbol;Acc:MGI:106035]	ENSMUSG00000031004	0.418063
Cenpa	centromere protein A [Source:MGI Symbol;Acc:MGI:88375]	ENSMUSG00000029177	0.3666
Lin9	lin-9 homolog (C. elegans) [Source:MGI Symbol;Acc:MGI:1919818]	ENSMUSG00000058729	0.185704
