# Supplementary material for: LIN9, a Subunit of the DREAM Complex, Regulates Mitotic Gene Expression and Proliferation of Embryonic Stem Cells
Source: PLoS One. 2013 May 7;8(5):e62882. doi: 10.1371/journal.pone.0062882 (PMC3647048; doi:10.1371/journal.pone.0062882)
Supplement: Table S2 — GO term analysis of genes downregulated after depletion of LIN9. (XLSX) [file pone.0062882.s003.xlsx]

## Sheet: GO downregulated
	Supplementary Table 2. GO analysis (downregulated genes)													Supplementary Table 1. LIN9 regulated genes in ES cells
	GO term analysis was performed to identify biological processes enriched among genes downregulated after depletion of LIN9													Genes regulated > 1.5 fold after depletion of LIN9
	Analysis with the DAVID programs
Category	Term	Count	%	PValue	Genes	List Total	Pop Hits	Pop Total	Fold Enrichment	Bonferroni	Benjamini	FDR
GOTERM_BP_FAT	GO:0022402~cell cycle process	30	17.5439	1.43771e-19	NM_001014976, NM_010436, NM_133851, NM_009791, NM_021515, NM_013917, NM_175384, NM_009876, NM_023223, NM_173762, NM_011121, NM_009774, NM_028222, NM_016692, NM_011496, NM_001081363, NM_010891, NM_007628, NM_007659, NM_009860, NM_001040435, NM_153058, NM_027975, NM_007634, NM_026785, NM_001079876, NM_001081117, NM_028232, NM_017407, NM_172301	117	393	13588	8.8654	1.42477e-16	1.42477e-16	2.26892e-16
GOTERM_BP_FAT	GO:0000279~M phase	26	15.2047	8.88162e-19	NM_001014976, NM_010436, NM_133851, NM_009791, NM_013917, NM_175384, NM_011121, NM_023223, NM_173762, NM_009774, NM_016692, NM_011496, NM_001081363, NM_010891, NM_007628, NM_007659, NM_009860, NM_001040435, NM_027975, NM_007634, NM_153058, NM_026785, NM_001081117, NM_028232, NM_172301, NM_017407	117	283	13588	10.6698	8.80169e-16	4.40084e-16	1.40165e-15
GOTERM_BP_FAT	GO:0007049~cell cycle	34	19.883	3.98216e-18	NM_001014976, NM_010436, NM_016681, NM_133851, NM_009791, NM_001103182, NM_021515, NM_013917, NM_175384, NM_009876, NM_023223, NM_173762, NM_011121, NM_020572, NM_009774, NM_028222, NM_016692, NM_011496, NM_011497, NM_001081363, NM_010891, NM_007628, NM_007659, NM_009860, NM_001040435, NM_153058, NM_027975, NM_007634, NM_026785, NM_001079876, NM_001081117, NM_028232, NM_017407, NM_172301	117	611	13588	6.4626	3.94632e-15	1.31544e-15	6.28445e-15
GOTERM_BP_FAT	GO:0000087~M phase of mitotic cell cycle	22	12.8655	1.10534e-17	NM_016692, NM_011496, NM_001081363, NM_010891, NM_133851, NM_007628, NM_009791, NM_007659, NM_009860, NM_175384, NM_013917, NM_011121, NM_153058, NM_027975, NM_173762, NM_023223, NM_007634, NM_026785, NM_009774, NM_028232, NM_017407, NM_172301	117	194	13588	13.1701	1.09539e-14	2.73847e-15	1.74439e-14
GOTERM_BP_FAT	GO:0022403~cell cycle phase	26	15.2047	3.04163e-17	NM_001014976, NM_010436, NM_133851, NM_009791, NM_013917, NM_175384, NM_011121, NM_023223, NM_173762, NM_009774, NM_016692, NM_011496, NM_001081363, NM_010891, NM_007628, NM_007659, NM_009860, NM_001040435, NM_027975, NM_007634, NM_153058, NM_026785, NM_001081117, NM_028232, NM_172301, NM_017407	117	328	13588	9.20596	3.01425e-14	6.02851e-15	4.80015e-14
GOTERM_BP_FAT	GO:0000278~mitotic cell cycle	23	13.4503	8.79591e-17	NM_016692, NM_011496, NM_011497, NM_001081363, NM_010891, NM_133851, NM_007628, NM_009791, NM_007659, NM_009860, NM_175384, NM_013917, NM_011121, NM_153058, NM_027975, NM_173762, NM_023223, NM_007634, NM_026785, NM_009774, NM_028232, NM_017407, NM_172301	117	244	13588	10.9473	1.10023e-13	1.83187e-14	1.77636e-13
GOTERM_BP_FAT	GO:0000280~nuclear division	21	12.2807	1.2264e-16	NM_016692, NM_011496, NM_010891, NM_133851, NM_007628, NM_009791, NM_007659, NM_009860, NM_175384, NM_013917, NM_011121, NM_153058, NM_027975, NM_173762, NM_023223, NM_007634, NM_026785, NM_009774, NM_028232, NM_017407, NM_172301	117	190	13588	12.8362	1.10023e-13	1.57652e-14	1.77636e-13
GOTERM_BP_FAT	GO:0007067~mitosis	21	12.2807	1.2264e-16	NM_016692, NM_011496, NM_010891, NM_133851, NM_007628, NM_009791, NM_007659, NM_009860, NM_175384, NM_013917, NM_011121, NM_153058, NM_027975, NM_173762, NM_023223, NM_007634, NM_026785, NM_009774, NM_028232, NM_017407, NM_172301	117	190	13588	12.8362	1.10023e-13	1.57652e-14	1.77636e-13
GOTERM_BP_FAT	GO:0048285~organelle fission	21	12.2807	2.49788e-16	NM_016692, NM_011496, NM_010891, NM_133851, NM_007628, NM_009791, NM_007659, NM_009860, NM_175384, NM_013917, NM_011121, NM_153058, NM_027975, NM_173762, NM_023223, NM_007634, NM_026785, NM_009774, NM_028232, NM_017407, NM_172301	117	197	13588	12.3801	2.20046e-13	2.75335e-14	3.55271e-13
GOTERM_BP_FAT	GO:0051301~cell division	21	12.2807	2.47008e-13	NM_016692, NM_011496, NM_010891, NM_133851, NM_007628, NM_009791, NM_011623, NM_007659, NM_009860, NM_175384, NM_013917, NM_011121, NM_153058, NM_027975, NM_173762, NM_023223, NM_007634, NM_026785, NM_028232, NM_017407, NM_172301	117	281	13588	8.67926	2.44801e-10	2.72001e-11	3.89844e-10
GOTERM_BP_FAT	GO:0007059~chromosome segregation	9	5.26316	6.57294e-08	NM_016692, NM_013917, NM_001081363, NM_001014976, NM_173762, NM_133851, NM_011623, NM_009774, NM_028232	117	64	13588	16.3317	6.51357e-05	6.51376e-06	0.000103731
GOTERM_BP_FAT	GO:0006323~DNA packaging	10	5.84795	1.90639e-07	NM_023422, NM_008197, NM_010436, NM_007681, NM_178187, NM_133851, NM_178218, NM_015786, NM_011623, NM_198622	117	101	13588	11.4987	0.000188906	1.71747e-05	0.000300857
GOTERM_BP_FAT	GO:0034622~cellular macromolecular complex assembly	12	7.01754	2.42252e-06	NM_023422, NM_008197, NM_146116, NM_010436, NM_007681, NM_178187, NM_010891, NM_007578, NM_009448, NM_178218, NM_015786, NM_198622	117	217	13588	6.42231	0.00239784	0.00020004	0.00382303
GOTERM_BP_FAT	GO:0006334~nucleosome assembly	8	4.67836	2.81837e-06	NM_023422, NM_008197, NM_010436, NM_007681, NM_178187, NM_178218, NM_015786, NM_198622	117	73	13588	12.7273	0.00278911	0.000214824	0.00444772
GOTERM_BP_FAT	GO:0031497~chromatin assembly	8	4.67836	3.38538e-06	NM_023422, NM_008197, NM_010436, NM_007681, NM_178187, NM_178218, NM_015786, NM_198622	117	75	13588	12.3879	0.0033493	0.000239608	0.0053425
GOTERM_BP_FAT	GO:0034728~nucleosome organization	8	4.67836	3.70273e-06	NM_023422, NM_008197, NM_010436, NM_007681, NM_178187, NM_178218, NM_015786, NM_198622	117	76	13588	12.2249	0.00366269	0.000244598	0.00584331
GOTERM_BP_FAT	GO:0065004~protein-DNA complex assembly	8	4.67836	3.70273e-06	NM_023422, NM_008197, NM_010436, NM_007681, NM_178187, NM_178218, NM_015786, NM_198622	117	76	13588	12.2249	0.00366269	0.000244598	0.00584331
GOTERM_BP_FAT	GO:0034621~cellular macromolecular complex subunit organization	12	7.01754	7.76762e-06	NM_023422, NM_008197, NM_146116, NM_010436, NM_007681, NM_178187, NM_010891, NM_007578, NM_009448, NM_178218, NM_015786, NM_198622	117	245	13588	5.68833	0.00766819	0.000480993	0.0122578
GOTERM_BP_FAT	GO:0065003~macromolecular complex assembly	13	7.60234	3.12498e-05	NM_010436, NM_007681, NM_007578, NM_009448, NM_010891, NM_178218, NM_198622, NM_023422, NM_008197, NM_146116, NM_008161, NM_178187, NM_015786	117	338	13588	4.4668	0.0304945	0.00182005	0.0493056
GOTERM_BP_FAT	GO:0006333~chromatin assembly or disassembly	8	4.67836	4.00377e-05	NM_023422, NM_008197, NM_010436, NM_007681, NM_178187, NM_178218, NM_015786, NM_198622	117	109	13588	8.5238	0.0389013	0.00220192	0.0631669
GOTERM_BP_FAT	GO:0051276~chromosome organization	14	8.18713	4.01115e-05	NM_010436, NM_007681, NM_133851, NM_178218, NM_011623, NM_198622, NM_023422, NM_008197, NM_013917, NM_178187, NM_001081102, NM_015786, NM_001098836, NM_009774	117	404	13588	4.02454	0.0389716	0.00208999	0.0632833
GOTERM_BP_FAT	GO:0043933~macromolecular complex subunit organization	13	7.60234	6.93101e-05	NM_010436, NM_007681, NM_007578, NM_009448, NM_010891, NM_178218, NM_198622, NM_023422, NM_008197, NM_146116, NM_008161, NM_178187, NM_015786	117	367	13588	4.11384	0.0663827	0.00342854	0.109326
GOTERM_BP_FAT	GO:0051327~M phase of meiotic cell cycle	6	3.50877	0.000926914	NM_013917, NM_001014976, NM_010436, NM_007628, NM_001081117, NM_028232	117	88	13588	7.91841	0.601081	0.0428181	1.45283
GOTERM_BP_FAT	GO:0007126~meiosis	6	3.50877	0.000926914	NM_013917, NM_001014976, NM_010436, NM_007628, NM_001081117, NM_028232	117	88	13588	7.91841	0.601081	0.0428181	1.45283
GOTERM_BP_FAT	GO:0051321~meiotic cell cycle	6	3.50877	0.00102591	NM_013917, NM_001014976, NM_010436, NM_007628, NM_001081117, NM_028232	117	90	13588	7.74245	0.638395	0.0451839	1.60683
GOTERM_BP_FAT	GO:0006325~chromatin organization	10	5.84795	0.00150011	NM_023422, NM_008197, NM_010436, NM_007681, NM_178187, NM_001081102, NM_178218, NM_015786, NM_001098836, NM_198622	117	315	13588	3.68688	0.774114	0.0626362	2.34133
GOTERM_BP_FAT	GO:0000910~cytokinesis	4	2.33918	0.00152708	NM_011496, NM_016692, NM_010891, NM_133851	117	27	13588	17.2054	0.780081	0.0611541	2.38296
GOTERM_BP_FAT	GO:0007017~microtubule-based process	8	4.67836	0.00220247	NM_146116, NM_008446, NM_001014976, NM_001040435, NM_173762, NM_009448, NM_133851, NM_009004	117	211	13588	4.40329	0.887528	0.0836913	3.41981
GOTERM_BP_FAT	GO:0045132~meiotic chromosome segregation	3	1.75439	0.00377894	NM_013917, NM_001014976, NM_028232	117	11	13588	31.6737	0.97653	0.134379	5.80003
GOTERM_BP_FAT	GO:0006979~response to oxidative stress	5	2.92398	0.00651487	NM_029688, NM_008161, NM_080728, NM_024198, NM_027127	117	87	13588	6.67453	0.998462	0.213295	9.8009
GOTERM_BP_FAT	GO:0007018~microtubule-based movement	5	2.92398	0.0109142	NM_146116, NM_008446, NM_173762, NM_009448, NM_009004	117	101	13588	5.74934	0.999981	0.321864	15.9021
GOTERM_BP_FAT	GO:0051640~organelle localization	4	2.33918	0.0109621	NM_001081363, NM_001040435, NM_133851, NM_009791	117	54	13588	8.60272	0.999982	0.313857	15.9664
GOTERM_BP_FAT	GO:0045664~regulation of neuron differentiation	5	2.92398	0.0112865	NM_010419, NM_008745, NM_011594, NM_007578, NM_009791	117	102	13588	5.69298	0.999987	0.312676	16.4003
GOTERM_BP_FAT	GO:0060341~regulation of cellular localization	6	3.50877	0.0122767	NM_001081363, NM_001040435, NM_010104, NM_173762, NM_008745, NM_007578	117	161	13588	4.32808	0.999995	0.326245	17.7119
GOTERM_BP_FAT	GO:0007050~cell cycle arrest	4	2.33918	0.0126956	NM_009876, NM_001079876, NM_028222, NM_021515	117	57	13588	8.14995	0.999997	0.32678	18.2609
GOTERM_BP_FAT	GO:0007263~nitric oxide mediated signal transduction	2	1.16959	0.0170016	NM_013602, NM_008630	117	2	13588	116.137	1	0.402472	23.7092
GOTERM_BP_FAT	GO:0051651~maintenance of location in cell	3	1.75439	0.0190708	NM_001040435, NM_173762, NM_009791	117	25	13588	13.9364	1	0.429491	26.2045
GOTERM_BP_FAT	GO:0001709~cell fate determination	3	1.75439	0.0220677	NM_008091, NM_010419, NM_008090	117	27	13588	12.9041	1	0.468382	29.6834
GOTERM_BP_FAT	GO:0009636~response to toxin	3	1.75439	0.0252456	NM_013602, NM_008630, NM_007488	117	29	13588	12.0141	1	0.505337	33.2042
GOTERM_BP_FAT	GO:0010273~detoxification of copper ion	2	1.16959	0.0253947	NM_013602, NM_008630	117	3	13588	77.4245	1	0.497897	33.3652
GOTERM_BP_FAT	GO:0045143~homologous chromosome segregation	2	1.16959	0.0253947	NM_013917, NM_001014976	117	3	13588	77.4245	1	0.497897	33.3652
GOTERM_BP_FAT	GO:0050767~regulation of neurogenesis	5	2.92398	0.0264559	NM_010419, NM_008745, NM_011594, NM_007578, NM_009791	117	132	13588	4.39912	1	0.503033	34.501
GOTERM_BP_FAT	GO:0001701~in utero embryonic development	7	4.09357	0.0268788	NM_010104, NM_008175, NM_001015099, NM_010856, NM_007488, NM_001167963, NM_172301, NM_008090	117	267	13588	3.04478	1	0.499598	34.9486
GOTERM_BP_FAT	GO:0051235~maintenance of location	3	1.75439	0.0321169	NM_001040435, NM_173762, NM_009791	117	33	13588	10.5579	1	0.554587	40.2601
GOTERM_BP_FAT	GO:0045651~positive regulation of macrophage differentiation	2	1.16959	0.0337167	NM_010496, NM_007778	117	4	13588	58.0684	1	0.56352	41.7995
GOTERM_BP_FAT	GO:0060024~rhythmic synaptic transmission	2	1.16959	0.0337167	NM_010104, NM_007578	117	4	13588	58.0684	1	0.56352	41.7995
GOTERM_BP_FAT	GO:0045787~positive regulation of cell cycle	3	1.75439	0.0339372	NM_001081363, NM_173762, NM_133851	117	34	13588	10.2474	1	0.55721	42.0088
GOTERM_BP_FAT	GO:0051726~regulation of cell cycle	6	3.50877	0.0364144	NM_007659, NM_001081363, NM_010436, NM_001040435, NM_173762, NM_133851	117	214	13588	3.25617	1	0.574668	44.3116
GOTERM_BP_FAT	GO:0051960~regulation of nervous system development	5	2.92398	0.0379327	NM_010419, NM_008745, NM_011594, NM_007578, NM_009791	117	148	13588	3.92354	1	0.581456	45.6804
GOTERM_BP_FAT	GO:0032880~regulation of protein localization	4	2.33918	0.0416941	NM_001081363, NM_001040435, NM_173762, NM_010891	117	90	13588	5.16163	1	0.608546	48.9368
GOTERM_BP_FAT	GO:0045649~regulation of macrophage differentiation	2	1.16959	0.0419682	NM_010496, NM_007778	117	5	13588	46.4547	1	0.602938	49.1668
GOTERM_BP_FAT	GO:0010035~response to inorganic substance	4	2.33918	0.0440334	NM_008161, NM_080728, NM_013602, NM_008630	117	92	13588	5.04942	1	0.61307	50.8689
GOTERM_BP_FAT	GO:0051258~protein polymerization	3	1.75439	0.045659	NM_146116, NM_010891, NM_009448	117	40	13588	8.71026	1	0.618966	52.1709
GOTERM_BP_FAT	GO:0060284~regulation of cell development	5	2.92398	0.0472465	NM_010419, NM_008745, NM_011594, NM_007578, NM_009791	117	159	13588	3.6521	1	0.624256	53.4112
GOTERM_BP_FAT	GO:0007242~intracellular signaling cascade	14	8.18713	0.0481236	NM_001013377, NM_010436, NM_010104, NM_016681, NM_013602, NM_007659, NM_023048, NM_029523, XM_001480481, NM_008141, NM_054040, NM_178683, NM_008630, NM_024457, NM_016858	117	915	13588	1.77696	1	0.623759	54.0835
GOTERM_BP_FAT	GO:0007346~regulation of mitotic cell cycle	4	2.33918	0.0489044	NM_007659, NM_001081363, NM_173762, NM_133851	117	96	13588	4.83903	1	0.622544	54.6743
GOTERM_BP_FAT	GO:0051240~positive regulation of multicellular organismal process	5	2.92398	0.0509216	NM_008091, NM_010104, NM_008745, NM_007778, NM_011905	117	163	13588	3.56248	1	0.630657	56.1679
GOTERM_BP_FAT	GO:0030900~forebrain development	5	2.92398	0.0547498	NM_001040435, NM_009697, NM_011261, NM_009791, NM_008090	117	167	13588	3.47715	1	0.651044	58.8764
GOTERM_BP_FAT	GO:0021700~developmental maturation	4	2.33918	0.0553479	NM_009876, NM_010419, NM_007578, NM_008090	117	101	13588	4.59948	1	0.648283	59.2851
GOTERM_BP_FAT	GO:0032886~regulation of microtubule-based process	3	1.75439	0.0563912	NM_001081363, NM_001040435, NM_173762	117	45	13588	7.74245	1	0.648603	59.989
GOTERM_BP_FAT	GO:0006882~cellular zinc ion homeostasis	2	1.16959	0.0582623	NM_013602, NM_008630	117	7	13588	33.1819	1	0.654336	61.2229
GOTERM_BP_FAT	GO:0046688~response to copper ion	2	1.16959	0.0582623	NM_013602, NM_008630	117	7	13588	33.1819	1	0.654336	61.2229
GOTERM_BP_FAT	GO:0043623~cellular protein complex assembly	4	2.33918	0.0650122	NM_146116, NM_010891, NM_007578, NM_009448	117	108	13588	4.30136	1	0.689234	65.3842
GOTERM_BP_FAT	GO:0055069~zinc ion homeostasis	2	1.16959	0.066306	NM_013602, NM_008630	117	8	13588	29.0342	1	0.690323	66.1325
GOTERM_BP_FAT	GO:0000226~microtubule cytoskeleton organization	4	2.33918	0.0693768	NM_001014976, NM_001040435, NM_173762, NM_133851	117	111	13588	4.18511	1	0.701113	67.8482
GOTERM_BP_FAT	GO:0000075~cell cycle checkpoint	3	1.75439	0.0727097	NM_007659, NM_010436, NM_173762	117	52	13588	6.7002	1	0.712583	69.6181
GOTERM_BP_FAT	GO:0044265~cellular macromolecule catabolic process	10	5.84795	0.0762979	NM_010724, NM_023048, NM_054040, NM_001081661, NM_015821, NM_023223, NM_001015099, NM_001167963, NM_026785, NM_001081656, NM_026383	117	609	13588	1.90701	1	0.724555	71.4213
GOTERM_BP_FAT	GO:0042770~DNA damage response, signal transduction	3	1.75439	0.0851779	NM_007659, NM_010436, NM_016681	117	57	13588	6.11246	1	0.759004	75.4623
GOTERM_BP_FAT	GO:0051603~proteolysis involved in cellular protein catabolic process	9	5.26316	0.0864408	NM_010724, NM_023048, NM_054040, NM_001081661, NM_015821, NM_023223, NM_001015099, NM_001167963, NM_026785, NM_001081656	117	534	13588	1.95736	1	0.758798	75.9915
GOTERM_BP_FAT	GO:0044257~cellular protein catabolic process	9	5.26316	0.0885918	NM_010724, NM_023048, NM_054040, NM_001081661, NM_015821, NM_023223, NM_001015099, NM_001167963, NM_026785, NM_001081656	117	537	13588	1.94643	1	0.762217	76.8682
GOTERM_BP_FAT	GO:0045860~positive regulation of protein kinase activity	4	2.33918	0.0897515	NM_010104, NM_173762, NM_007778, NM_011261	117	124	13588	3.74635	1	0.761578	77.3284
GOTERM_BP_FAT	GO:0042403~thyroid hormone metabolic process	2	1.16959	0.0900307	NM_007578, NM_011261	117	11	13588	21.1158	1	0.757462	77.4378
GOTERM_BP_FAT	GO:0006468~protein amino acid phosphorylation	10	5.84795	0.0965465	NM_007659, NM_138606, NM_011496, NM_011497, NM_011121, NM_016681, NM_008745, NM_020572, NM_011261, NM_172301	117	640	13588	1.81464	1	0.777259	79.8569
GOTERM_BP_FAT	GO:0033674~positive regulation of kinase activity	4	2.33918	0.0999092	NM_010104, NM_173762, NM_007778, NM_011261	117	130	13588	3.57344	1	0.78433	81.008
